# Supplementary material
Source: MDPI journal article supplement (https://www.mdpi.com/2311-553X/4/3/16)
Supplement: s1 [file s1]

Formation of a family of long intergenic non-coding RNA genes with an embedded translocation breakpoint motif in human chromosomal Low Copy Repeats of 22q11.2 - some surprises and questions

Nicholas Delihias  
Department of Molecular Genetics and Microbiology  
School of Medicine  
Stony Brook University  
Stony Brook, New York, 11794-5222 USA

Supplementary File 1 (reproduced from reference 13)

Table S1. Properties of lincRNA genes in chr22\*

| lincRNA gene,<br>chromosomal location,<br>length; LCR22 position                                            | lincRNA nt positions | FAM230C nt positions |
|-------------------------------------------------------------------------------------------------------------|----------------------|----------------------|
| 1. LINC01663 (AC008103.3)<br>chr22: 18,872,943-18,895,007<br>22065 bp; LCR22A                               | 314 -21974           | 17003- 37928         |
| 2. LINC01660 (AC011718.2)<br>chr22: 18,361,223-18,391,705<br>30,483 bp; LCR22A                              | 4028-21304           | 16903-37928          |
| 3. LINC01662 (AC008132.15)<br>Chr22: 18,733,314-18,758,506<br>25,913 bp LCR22A                              | 1-16346              | 17872-37928          |
| 4. FAM230B<br>chr:22: 21,167,158-21,192,756<br>25,599 bp; LCR22D                                            | 1-16529              | 17410-37928          |
| 5. AP000552.1 (KB-1183D5.13)<br>chr22: 21,300,390-21,325,642<br>25,253 bp; LCR22D                           | 1-16588              | 17408- 37928         |
| 6. AC007731.1<br>chr22:20,338,205-20,354,972<br>16,768 bp; LCR22B                                           | 1- 16551             | 17401-37928          |
| 7. AC008079.1<br>chr: 22: 18,177,438-18,206,515<br>29,078 bp; LCR22A                                        | 380- 16994           | 16994-37928          |
| 8. <a href="#">LINC01658</a> (AP000345.1)<br><a href="#">chr22</a> : 23461486-23487580<br>26,095 bp; LCR22F | 1- 16761             | 16668-37928          |

\* Most genes have multiple transcripts. The Transcript Support Levels (TSL) (from Ensembl) for each gene vary from 1-5, depending on the transcript.
