# Supplementary material
Source: MDPI journal article supplement (https://www.mdpi.com/2311-553X/4/3/16)
Supplement: s1 [file s1]

# Formation of a family of long intergenic non-coding RNA genes with an embedded translocation breakpoint motif in human chromosomal Low Copy Repeats of 22q11.2 - some surprises and questions

Nicholas Delihias  
Department of Molecular Genetics and Microbiology  
School of Medicine  
Stony Brook University  
Stony Brook, New York, 11794-5222 USA

## Supplementary File 3

Annotated transcript: LINC01660-203

Transcript ID: ENST00000618517.4

Transcript Support Level (TSL) is 2

>exon1.LINC01660-203  
GATTAGGGATCTCCTGCCCTTGGTCGTAAGTGCCACTACCTGTGCTGAGTTTTTCAAAGG  
TCAGAGCAGATTGAACCATTGTGGTTTCATTTTCCCTGATTTTGATTTTCTTATGGGGA  
ACCTGTGTGGCTGCATTCAAG

Query: TBTA  
Subject: LINC01660-203.exon1

| Score         |     | Expect                                                       | Identities   | Gaps      | Strand    |
|---------------|-----|--------------------------------------------------------------|--------------|-----------|-----------|
| 250 bits(135) |     | 1e-70                                                        | 139/141(99%) | 0/141(0%) | Plus/Plus |
| Query         | 580 | GATTAGGGATCTCCTGCCCTTGGTCCTAAGTGCCACTATCTGTGCTGAGTTTTTCAAAGG |              |           | 639       |
|               |     |                                                              |              |           |           |
| Sbjct         | 1   | GATTAGGGATCTCCTGCCCTTGGTCGTAAGTGCCACTACCTGTGCTGAGTTTTTCAAAGG |              |           | 60        |
| Query         | 640 | TCAGAGCAGATTGAACCATTGTGGTTTCATTTTCCCTGATTTTGATTTTCTTATGGGGA  |              |           | 699       |
|               |     |                                                              |              |           |           |
| Sbjct         | 61  | TCAGAGCAGATTGAACCATTGTGGTTTCATTTTCCCTGATTTTGATTTTCTTATGGGGA  |              |           | 120       |
| Query         | 700 | ACCTGTGTGGCTGCATTCAAG                                        |              |           | 720       |
|               |     |                                                              |              |           |           |
| Sbjct         | 121 | ACCTGTGTGGCTGCATTCAAG                                        |              |           | 141       |

Figure S2. Nucleotide sequence alignment of the exon1 sequence from RNA transcript LINC01660-203 (subject) with the TBTA (query). TBTA positions 580-720 are part of the HSAT1 sequence (see Figure 4, text).
