# Supplementary material
Source: MDPI journal article supplement (https://www.mdpi.com/2311-553X/4/3/16)
Supplement: s1 [file s1]

Formation of a family of long intergenic non-coding RNA genes with an embedded translocation breakpoint motif in human chromosomal Low Copy Repeats of 22q11.2 - some surprises and questions

Nicholas Delihias  
Department of Molecular Genetics and Microbiology  
School of Medicine  
Stony Brook University  
Stony Brook, New York, 11794-5222 USA

Supplementary File 2

|           |      |                                                            |      |
|-----------|------|------------------------------------------------------------|------|
| TBTA      | 1105 | ---tatttcc-----caaactccc-----aaattat                       | 1126 |
|           |      | .      .   .   .                                           |      |
| LINC01663 | 2600 | TTGCATTCCAGCCTGTGCAACAGAAAAAGTCTCTGTCTCAAAA <b>AAATTAT</b> | 2649 |
| TBTA      | 1127 | atatatat-atatatataaaatata-----tata                         | 1154 |
|           |      | . .                                                        |      |
| LINC01663 | 2650 | ATATATATAATATATATTATATATATTTTATATAACATATATTTTTTATA         | 2699 |
| TBTA      | 1155 | taatatataatataatataatataatataatata-----                    | 1193 |
|           |      | .        .       .       .                                 |      |
| LINC01663 | 2700 | TTATATATAATATATATTATATATTATATATATTATATATTATATATTAT         | 2749 |
| TBTA      | 1194 | -----                                                      | 1193 |
| LINC01663 | 2750 | ATAAAATGTATTATATATTATATATTATATCTATTATATACATTATATAT         | 2799 |
| TBTA      | 1194 | -----taatatat                                              | 1201 |
|           |      |                                                            |      |
| LINC01663 | 2800 | AGTATATATTATATACCATATATAATATATGTAGTATACATGTAATATAT         | 2849 |
| TBTA      | 1202 | aatatatattatat-----                                        | 1215 |
|           |      |                                                            |      |
| LINC01663 | 2850 | AATATATATTATATGTCATATCATATATAATGTCATATTATATATCATAT         | 2899 |
| TBTA      | 1216 | -----atataatatataatata-----                                | 1234 |
|           |      |                                                            |      |
| LINC01663 | 2900 | ATAATATATATTACATATAATATATAATATATATTACATATAATATATAA         | 2949 |
| TBTA      | 1235 | -atatatt-----atatgtaatatatatta-----aatatataat---           | 1268 |
|           |      | .                                                          |      |
| LINC01663 | 2950 | TATATATTACATATAATATATAATATATATTACATATAATATATAATACA         | 2999 |
| TBTA      | 1269 | -----gtataatatatgatataatatat-----                          | 1293 |
|           |      | .        .                                                 |      |
| LINC01663 | 3000 | TATTACATATAATATATAATATATAATATATATTACATATAATATATAAT         | 3049 |
| TBTA      | 1294 | -----tatatatattatatattat-----                              | 1310 |
|           |      |                                                            |      |
| LINC01663 | 3050 | ATATAATATATATTACATATTATATATATTATATATTATACATTATATAT         | 3099 |
| TBTA      | 1311 | -----atatataat-----                                        | 1319 |
|           |      |                                                            |      |
| LINC01663 | 3100 | ATTACATCATATATCATATATAATATCTTATATCATATATTATATTATAT         | 3149 |
| TBTA      | 1320 | -----atatattatatatta-----tatattatatatat                    | 1348 |
|           |      | .                                                          |      |
| LINC01663 | 3150 | ATAATGTATCATAATATATTATATATTATCATATATTATATTATATATAA         | 3199 |
| TBTA      | 1349 | tatat-----atattatatattatattatatatat-----tatataata          | 1387 |
|           |      | .              .                                           |      |
| LINC01663 | 3200 | TATATCATAAGATATAATATATTATATTATATATATCATAATATATTATA         | 3249 |
| TBTA      | 1388 | ---tatattatgtatatattatataaatat-----ttata-tatatta--         | 1425 |
|           |      | .                                                          |      |
| LINC01663 | 3250 | TATTATATTAT-TACATATTATATAATATTACATATTATATTATATTATT         | 3298 |
| TBTA      | 1426 | --tatataatatataa----ttat-----atattatatatt                  | 1457 |
|           |      | .   .                                                      |      |
| LINC01663 | 3299 | ATTATATATTATGTAATATTTTATATTATATATGTAATATTATATATATT         | 3348 |
| TBTA      | 1458 | ata---taatatataattat----ttacataatatatacaaatttgtgtg         | 1500 |
|           |      | .     .     .   .   .                                      |      |
| LINC01663 | 3349 | ATATTGTAATATAT-ATTATAGTATGACATATTATATATAATATTATAT-         | 3396 |

**Figure S1.** Nucleotide sequence alignment of the TBTA AT-rich region #2 with the AT-rich region of LINC01663 that is highlighted in red letters. TBTA position 1120 is the start of the AT-rich region #2 and position 1492 is the end. The position 1493 is the start of the PATRR sequence in the TBTA. The EMBL-EBI program Clustal Omega was used (<https://www.ebi.ac.uk/Tools/msa/clustalo/>)
