# Supplementary material
Source: MDPI journal article supplement (https://www.mdpi.com/2311-553X/4/3/16)
Supplement: s1 [file s1]

Formation of a family of long intergenic non-coding RNA genes with an embedded translocation breakpoint motif in human chromosomal Low Copy Repeats of 22q11.2 - some surprises and questions

Nicholas Delihias  
Department of Molecular Genetics and Microbiology  
School of Medicine  
Stony Brook University  
Stony Brook, New York, 11794-5222 USA

Supplemental File 4 Figure S3

Nucleotide sequence alignment

Query: FAM230C gene sequence

Subject: DNA sequence from GenBank: AC191381.3. DNA obtained from white blood cells of male chimpanzee (Pan troglodytes, 'Clint', Yerkes #C0471 as described, GenBank: AC191381.3).

Pan troglodytes BAC clone CH251-588A5 from chromosome 22, complete sequence  
Sequence ID: [AC191381.3](#) Length: 226324

| Alignment         |        |                                                               |                                                            |               |            |
|-------------------|--------|---------------------------------------------------------------|------------------------------------------------------------|---------------|------------|
| Score             |        | Expect                                                        | Identities                                                 | Gaps          | Strand     |
| 28513 bits(15440) |        | 0.0                                                           | 16622/17181(97%)                                           | 127/17181(0%) | Plus/Minus |
| Query             | 20796  | AAAT                                                          | tatataatatatatgtat-tttata-tatataattgtatatataattatataaatata |               | 20853      |
| Sbjct             | 193653 | AAAT                                                          | TATATATTTA-AT-TATAATTATATTTATAT-ATAATATATATTAT-ATATATTATA  |               | 193598     |
| Query             | 20854  | taatatagatatataatatataataatattattttatatat-t-atatatattgtata-a  |                                                            |               | 20910      |
| Sbjct             | 193597 | TA-TATA-AAATG                                                 | TATTATATTTATACAT-A-TTATATATGTAATATGTATTATATATA             |               | 193542     |
| Query             | 20911  | -tatataattatacatatataaattatat-ttataatatatgtataATTTCC          | TTTTTACATCC                                                |               | 20968      |
| Sbjct             | 193541 | TTATATATAATGTATATATA-TTATGTAATATAATATATATAATAATTTCC           | TTTTTACATCC                                                |               | 193483     |
| Query             | 20969  | TGCATCCTTCAACGTTCCATCCCCCACCACAGATTAA-TTATTCCTAGGGGAGAATA     |                                                            |               | 21027      |
| Sbjct             | 193482 | TGCATCCTTCAACGTTCCATCCGTCACCCACAGATTAAGTTATTCCTAGGGGAGAGGA    |                                                            |               | 193423     |
| Query             | 21028  | TGGCAAAGTCTATTTTAAATTCAGTTT-TAACCTAATTAAGAACCTATGAAATCATTACT  |                                                            |               | 21086      |
| Sbjct             | 193422 | TGGCAAAGTCTATTTTAAATGCAGTTT-TTAAACCTAATTAAGGAACATGAAATCATTACT |                                                            |               | 193363     |
| Query             | 21087  | TTCCAAAACTTTGGAAACAAGCCACAGTAGTATGGATGGGTTGGAGGCTTTTCACACCAT  |                                                            |               | 21146      |
| Sbjct             | 193362 | TTCCAAATATTTGAAACAAGCCACAGTAGTATGCATGGGTTGGAGGCTTTTCACACAAT   |                                                            |               | 193303     |
| Query             | 21147  | AAAATGTACCTATCTTTGTTTTTAACATGTTTTTCCCTTCCTCTCTTC              | tttttttGTGAA                                               |               | 21206      |
| Sbjct             | 193302 | AAAATGTACCTATCTTTGTTTTTAACATGTTTTTCCCTTCCTCTCTTCTTTTTTGTGAA   |                                                            |               | 193243     |
| Query             | 21207  | ATGTGTATTTACTTTTAATAAAATTGTAGTAAGTCATTTCCATTCACATATTAATTTT    | TTA                                                        |               | 21266      |
| Sbjct             | 193242 | ATGTGTATTTACTTTAATAAAATTGTAGTAAGTCGTTTCCATTCACATATTAATTTT     | TTA                                                        |               | 193183     |
| Query             | 21267  | AAGTAATAAGAACGTGATTGTCTGCGTGTGAAATAAACTCACATTTATTTTATGCTT     |                                                            |               | 21326      |
| Sbjct             | 193182 | AAGTAATAAATAGTGTATTGTCTACGTGTGAAATAAAACACAC-TTT-TTTT          | TATGCTT                                                    |               | 193125     |
| Query             | 21327  | TTGGAGTTATCCAAAATCATGGAATTGTCAATCACAGTCAATCACCCAACCTACTCACCT  |                                                            |               | 21386      |
| Sbjct             | 193124 | TGGGAGTTATCCAAAATCATGGAATTGTCCATCACAGTCAATCACCCAACCTACTCACCT  |                                                            |               | 193065     |
| Query             | 21387  | TTCCAGTGTAATCTTAGTCAAAttttttttGTTATCCAATGAGATGCAGTATTTCAACT   |                                                            |               | 21446      |
| Sbjct             | 193064 | TTCCAGTGTAATCTTAGTCAAATTTTTTTTGTATCCAATGAGATGCAGTATTTCAACT    |                                                            |               | 193005     |
| Query             | 21447  | CAGAAAGATAAAATAGAAATTAATTGGTAGAGACTATTAAC                     | TAAGAACATACAGTTTTATTT                                      |               | 21506      |
| Sbjct             | 193004 | CACAAAGATAAAATAGAAATGAATTGGTAGAGACTATTAAC                     | TAAGAACATACAGTTTTATTT                                      |               | 192945     |
| Query             | 21507  | ATACTCAGAAGCAAGTAGATTATGTACATATATATGAAGATTAAAAT               | TTAAAGGATAATT                                              |               | 21566      |
| Sbjct             | 192944 | ATACTCAGAAGCAAGTAGATTATGTACATATATATGAAGATAAAAAT               | TTAAAGGATAATT                                              |               | 192885     |
| Query             | 21567  | GTGTAAATTTGCCTGTAGAGAGCTTTGAAATCCTGTTACTTGTTAATGCTGTTTGATG    |                                                            |               | 21626      |
| Sbjct             | 192884 | GTGTAAATTTGCATGTAGAGAGCTTTGAAACCTGTTACTTGTTAATGCTGTTTGATG     |                                                            |               | 192825     |
| Query             | 21627  | TATTGTGTGACTTTGTTCTCCCGACCCATCATCCAGAGCTCTCTGCAGGAGCTAAGTGCT  |                                                            |               | 21686      |
| Sbjct             | 192824 | TATTGTGTGACTTAGTTCTCCCGACCCATCATCCAGAGCTCTCTGCAGGAGCTAAGTGCT  |                                                            |               | 192765     |
| Query             | 21687  | CATCAGTTCCATGACTTGGCAACTGTCTAAGTTTAGAGGCAC                    | TTGTATTGTTAGTAAAT                                          |               | 21746      |
| Sbjct             | 192764 | CATCAGTTCCATGACTTGGAAACTGTCTAAGTTTAGAGGCAC                    | TTGTATTGTTAGTAAAT                                          |               | 192705     |
| Query             | 21747  | AAGGCAAGATGATATTGTTTCACAGGTTTAGTGCAGAAGACTGAATAGATAAGCTGCTC   |                                                            |               | 21806      |
| Sbjct             | 192704 | AAGGCAAGATGATATTGTTTCACAGGCTTAGTGCAGAAGACTGAATAGAGAAGCTGCTC   |                                                            |               | 192645     |
| Query             | 21807  | CACCCAGTACACTGGTGTTCAATTCATGGTCATCTCATCTGTTAACCATGGATAAAAAAC  |                                                            |               | 21866      |
| Sbjct             | 192644 | CACCCAGTACACTGGTGTTCAATTCATGGTCATCTCATCTGTTAGCCATGGATATAAAAC  |                                                            |               | 192585     |
| Query             | 21867  | ACTTATCTTCAATGATCTTCCTGTACATGTAAAAACACACCTGTCTACATGGCAGCAGTT  |                                                            |               | 21926      |
| Sbjct             | 192584 | ACTTATCTCCAATGATCTTCCTGTACATGTAAAAACACACCTGTCTACATGGCAGCAGTT  |                                                            |               | 192525     |
| Query             | 21927  | GGACCTCACACGTTGGATTGTGCCTTCACCCCTGGAATGTCTATGATGCCCTATCGACCAT |                                                            |               | 21986      |
| Sbjct             | 192524 | GGACCTCACAAATGTGATTGTGCCTTCACCCCTGGAATGTCTATGATGCCCTATCGACCAT |                                                            |               | 192465     |
| Query             | 21987  | GGTGATGGGATTAGGGATCTCTTGCCCTTTGCTCTGCCACTGTCTGCACCAGCCAGGCCA  |                                                            |               | 22046      |
| Sbjct             | 192464 | GGTGATGGGATTAGGGATCTCTTGCCCTTTGCTCTGCCACTGTCTGTGCCAGCCAGGCCA  |                                                            |               | 192405     |
| Query             | 22047  | CTGGGCCATTGTGGCAGATGGTGATGCCCTTTGTGTGGAGCGCACTGTGTGTGCGCTGAG  |                                                            |               | 22106      |
| Sbjct             | 192404 | CTGGGCCATTGTGGCGGATGGTGATGCCCTTTGTGTGGAGCGCACTGAGTGTGTGCTGAG  |                                                            |               | 192345     |
| Query             | 22107  | GCAGACACAGTACTTTTGACAACCTTATCTGCTTCTTCAAAACTGGGTCTGCATTATGA   |                                                            |               | 22166      |
| Sbjct             | 192344 | GCAGACACAGTACTTTTGACAACCTTATCTGCTTGTTTCAAAACTGGGTCTGCATTATGA  |                                                            |               | 192285     |
| Query             | 22167  | TAAAGTGGTTGGTTTTAGGCCAAGCAGGTGCATGTATAGAACAAATGACTTGGGAGTTCA  |                                                            |               | 22226      |
| Sbjct             | 192284 | TAAAGTGTGGTTTTAGGCCAAGCAGGTGTATGTATAGAACAAATGACTTGGGAGTTCA    |                                                            |               | 192225     |
| Query             | 22227  | GAATCCTGGGCGTGAATAAGCCTCTGAGCCTTATTAAGCTGTGAAATCTAAAGCAAGACA  |                                                            |               | 22286      |
| Sbjct             | 192224 | GAATCCTGGGCGTGAATAAGCCTCTGAGCCTTATTAAGCTGTGAAATCTAAAGCAAGACA  |                                                            |               | 192165     |
| Query             | 22287  | TTTCCCTGATAAATTAAGCCTCATGAGCACTTATACTGTACACTTTACCTACATCAAATCA |                                                            |               | 22346      |
| Sbjct             | 192164 | TTTCACTGATAAATTAAGCCTCATGAGCACTTATACTGTACACTTTACCTACATCAAATCA |                                                            |               | 192105     |
| Query             | 22347  | TTCGGCCATCACACAGACAAATGGCATGATTGATTACTATCACCTTTTACTGGGCAGA    |                                                            |               | 22406      |
| Sbjct             | 192104 | TTCGGCCATCACACAGACAAATGGCATGATTACTATCACCTTTCGCTGGGCAGA        |                                                            |               | 192045     |
| Query             | 22407  | AAAAGACAGAGATGAATGTGCCAAGCTTATTAGCCCCTCAGCAAAAGAGCCAAGATGGG   |                                                            |               | 22466      |
| Sbjct             | 192044 | AAAAGACAGAGATGAATGTGCCAAGCTTATGAGCCCCTCAGCAAAAGAGCCAAGATGGG   |                                                            |               | 191985     |
| Query             | 22467  | AACCCAAGCATACAGCCCCAATGCTGAGGCTCTGAACTACTGACCTGCCCTCAGCACTCA  |                                                            |               | 22526      |
| Sbjct             | 191984 | AACCCAAGCATACAGCCCCAGTGCGGAGGCTCTGAACTACTGAGCTGCCCTCAGCACTCA  |                                                            |               | 191925     |
| Query             | 22527  | GCCTTGGGATCATGAGTCACTGTGCAAGGGAGTCCCAACATCTGCATGTATGCTTGGAAAT |                                                            |               | 22586      |
| Sbjct             | 191924 | GCCTTGGGATCATGAGTCACTGTGCAAGGGAGTTCCAACATCTGCATGTATGCTTGGAAAT |                                                            |               | 191865     |
| Query             | 22587  | GATCTGAGCCTGTAGAGTTCTTACACACTGGCCACATTATAGGGTGGTGTCTGTGGTCAC  |                                                            |               | 22646      |
| Sbjct             | 191864 | GATCTGAGCCTGTAGAGTTCTTACACACTGGCCACATTATAGGGTGGTGTCTGTGGTCAC  |                                                            |               | 191805     |
| Query             | 22647  | ACAGCTCAGGGCAGGTATTAGTACATGAATAGCTTAGCGGTGTCATAGTCTTTATGTGAA  |                                                            |               | 22706      |
| Sbjct             | 191804 | ACAGCTCAGGGCAGGTATTAGTACATGAATAGCTTAGCTGTGTCATAGTCTTTATGTGAA  |                                                            |               | 191745     |
| Query             | 22707  | AGGCTCATAAAGCCCCAAATGCCTTTGAACTGGTTGCGGATTTTGAGTTGGAGGA--ACA  |                                                            |               | 22764      |
| Sbjct             | 191744 | AGGCACATAAAAGCCCCAAATGCCTTTGAACTGGTTGCGGATTTTGAGTTGGAGGACAACA |                                                            |               | 191685     |
| Query             | 22765  | CTTGGGACAACCGGTACATTCCTTCAGTGCGGGGCCACTCCTCAGCACATATCCCAAAG   |                                                            |               | 22824      |
| Sbjct             | 191684 | CTTGGGACAACCGGTACATTCCTTCAGTGCGGGGCCACTCCTCAGCACATATCCCAAAG   |                                                            |               | 191625     |

|       |        |                                                                     |        |
|-------|--------|---------------------------------------------------------------------|--------|
| Query | 22825  | CCGGTAAATAATGGGAAGACCCCTGACTGATGTTTGATGGTGTATGAACTTCAAATGAC<br>     | 22884  |
| Sbjct | 191624 | CCGGTAAATAATGGGAAGACCCCTGACTGATGTTTGATGGTATTATGAACTTCAAATGAC<br>    | 191565 |
| Query | 22885  | CCCTATAGAAATGTTaaaaaaaaaaaa--GTCTGTGAGCTACACAACCTGGGGACAAGA<br>     | 22942  |
| Sbjct | 191564 | CCCTATAGAAATGTTAAAAAAAAAAAAAAGTCTGTGAGCTACACAAGCTGGGGACAAGA<br>     | 191505 |
| Query | 22943  | CAAG----AACACAAAATACCACTAAATAATGAGCCTCATGTGTCACCCTGCTTGCAACT<br>    | 22998  |
| Sbjct | 191504 | CAAGTAAGAACATAAAATACCACTAAATAATGAGCCTCATGTGTCACCCTGCTTGCAACT<br>    | 191445 |
| Query | 22999  | CCCTTGGCAGCTGGTTTCAAGAGCCTCAGTGCTCACCAGGGCCCATCTCCCTGCTCTGCC<br>    | 23058  |
| Sbjct | 191444 | CCCTCGGCAGCTGGTTTGAAGAGCCTCAGTGCTCACCAGGGCCATCTCCCGCTCTGCC<br>      | 191385 |
| Query | 23059  | CTCTCTCGCTGTGGGTTGCCTGGGCTGAACATGGGCAGCCCCCTCACACGATGACTGCAAA<br>   | 23118  |
| Sbjct | 191384 | CTCTCTCGCTGTGGGTTGCCTGGGCTGAACATAGGCAGCCCCCTCACATGATGACTGCAAA<br>   | 191325 |
| Query | 23119  | CACAGGGCAAAGGAAGACTGAACGGAAAAATGTATGGTTATAGTGGTTAttttaaaatata<br>   | 23178  |
| Sbjct | 191324 | CACAGGGCAAAGGAAGACTGAACGGAAAAATGTATGGTTATAGTGGTTATTTTAAATATA<br>    | 191265 |
| Query | 23179  | agtattttcagtatttttctaactctttaat---t-attatttttaggggaggtttttttttt<br> | 23234  |
| Sbjct | 191264 | AGTATTTTCAGTATTTTCTAATCTTTAATAATTGATTATTTTAGGGGAGGTTTTTTTTTT<br>    | 191205 |
| Query | 23235  | ttt--GAGACAGAGTCTTGC-----CCAGGCTGGAGTGCAGTGGCATGATCTCAGCT<br>       | 23284  |
| Sbjct | 191204 | TTTTTGAGACAGAGTCTTGGCGTGTTGCCCAGGCTGGAGTGCAGTGGCATGATCTCAGCT<br>    | 191145 |
| Query | 23285  | CACTGCAACCTCTGCCTCCCTGTGTTCAAGCGATTCTCCTGCCTCAGCCTCCCAAGTAGCT<br>   | 23344  |
| Sbjct | 191144 | CACTGCAACCTCTACCTCCCTGTGTTCAAGCGATTCTCCTGCCTCAGCCTCCCGAGTAGCT<br>   | 191085 |
| Query | 23345  | GGGACTACAGGCACGTCGCCACCCACGCTGGCAAAGTTTTTGTGTTTTTAGTAGAGATGGG<br>   | 23404  |
| Sbjct | 191084 | GGGAATACAGGCAAGTGCCACCATGCCTGGCAAAGTTTTTGTGTTTTTAGTAGAGACGGG<br>    | 191025 |
| Query | 23405  | GTTTCATTCTGTTAGCCAGGATGGTCTCAATCTTCTGTCTCATGATCCACCCACCTCAG<br>     | 23464  |
| Sbjct | 191024 | GTTTCACCTCTGTTAGCCAGGATGGTCTCAATCTTCTGACCTCATGATCCACCCGCTCGG<br>    | 190965 |
| Query | 23465  | CCTCCCAAAGTGCTGGGATTACAGGCGTGAGCCACCACACCTGGCCTGAAttttttatttt<br>   | 23524  |
| Sbjct | 190964 | CCTCCCAAAGTGCTGGGATTACAGGCGTGAGCCACCACACCTGGCCTGAGTTTTTATTTT<br>    | 190905 |
| Query | 23525  | ttattttttttGAGATGAAGTCTCTGTCACCCAGGCTGGAGTGCAGTGGTGCAATCTCAGC<br>   | 23584  |
| Sbjct | 190904 | TATTTTTTTTTGAGATGAAGTCTCTGTCACCCAGGCTGGAGTGCAGTGGTGCAATCTCAGC<br>   | 190845 |
| Query | 23585  | TCACTGCAATCTCTGCCTCCAGGTTCAAGGGATTCTCCTGCCTCAGCCTCCTGAGTAGCT<br>    | 23644  |
| Sbjct | 190844 | TCACTGCAATCTCTGCCTCCAGGTTCAAGGGATTCTCCTGCCTCAGCCTCCTGAGTAGCT<br>    | 190785 |
| Query | 23645  | GGGttttttttttttttttttttttttttttttAGTTGAGATGGGGTTTTACCATGTTG<br>     | 23704  |
| Sbjct | 190784 | GGGTT-----GTTTTTTTTTTTTTAATTGAGATGGGGTTTTACCATGTTG<br>              | 190739 |
| Query | 23705  | GTCAGGCTGGTCTCGAACTCCTGACCTCAAATGATCCGCCACCTCCACCTTCCAAACTG<br>     | 23764  |
| Sbjct | 190738 | GTCAGGCTGGTCTCGAACTCCTGACCTCAAATGATCCGCCACCTCCACCTTCCAAACTG<br>     | 190679 |
| Query | 23765  | CTGGGATTACAGGTGTGAGCCACTATGCCTGACT---ATTTCATAACCAAGAAAAGAA<br>      | 23820  |
| Sbjct | 190678 | CTGGGATTACAGGTGTGAGCCACTATGCCTGACTGATTATTTTCATAACCAAGAAAAGAA<br>    | 190619 |
| Query | 23821  | ATAAGTACAATTAATGCTGGTGCATGGTATTAATCTAGTTTTTAAAAAATTCACACATA<br>     | 23880  |
| Sbjct | 190618 | ATAAATAATAATTAATGCTGGTGCATGGTATTAATCTAGTTTTTAAAAAATTCACACATA<br>    | 190559 |
| Query | 23881  | AACAAGGCAGAACCTTATACCTCCATGATAAATGCAGTAGCAGTGTATGTGGTCTGTG<br>      | 23940  |
| Sbjct | 190558 | TACAAGGCAGAACCTTATACCTCCATGATAAATGCAGTAGCAGTGTATGTGGTCTGTG<br>      | 190499 |
| Query | 23941  | GAGGTTGAAAGGGACTTGGTAGATGTCAAGAAGGTAGTGGCAGTCTTGCTGGGCTTTTAA<br>    | 24000  |
| Sbjct | 190498 | GAGGTTGAAAGGGACTTGGTAGATGTCAAGAAGGTAGTGGCAGTCTTGCTGGGCTTTTAA<br>    | 190439 |
| Query | 24001  | AGGGTCTGAAGAAGTGACAGGATGCTGTGGTTGAATCCTAGCATGTATTTTAGCATTTGT<br>    | 24060  |
| Sbjct | 190438 | AGGGTCTGAAGAAGTGACAGGATGCTGTGGTTGAATCCTAGCATGTATTTTAGCATTTGT<br>    | 190379 |
| Query | 24061  | TCATTTGGAGTTTGATTATTTTCACGTTGCTTTTCATTTGCCATTACCTGGAAAGCCAAGGG<br>  | 24120  |
| Sbjct | 190378 | TCATTTGGAGTTTGATTATTTTCACGTTGCTTTTCATTTGCCATTACCTGGAAAGCCAAGGG<br>  | 190319 |
| Query | 24121  | CTCTACTCTCATTTTCCTTGCTCCTGTTTCTTTGCCTTCCTTGGTCCGTGAAGAAGATGGT<br>   | 24180  |
| Sbjct | 190318 | CTCTACTCTCATTTTCCTTGCTGCTCTTTCTTTGCCTTCCTTGGTCCATGAAGAAGATGGT<br>   | 190259 |
| Query | 24181  | CCAGGAGAAGCTCATTCATGCTTGTTAACCAGGCACACCCCTAAGTTCCAGTCCCTGAG<br>     | 24240  |
| Sbjct | 190258 | CCAGGAGAAGCTCATTCATGCTTGTTAACCAGGCACACCCCTAAGTTCCAGTCCCTGAG<br>     | 190199 |
| Query | 24241  | TCATTTCATGAGTAGCACTGCCAATGAACTGACAGCCATGCTGTGCCCTCCACATCCCCCT<br>   | 24300  |
| Sbjct | 190198 | TCATTTCATGAGTAGCACTGCCAATGAACTGACAGCCATGCTGTGCCCTCCACATCCCCCT<br>   | 190139 |
| Query | 24301  | AGGTGACTCGAAGAAATCTTCCAAAAGCGTGTGAAAAGGGAGCCCTACTCTACTACCAA<br>     | 24360  |
| Sbjct | 190138 | AGGTGACTCGAAGAAAGCCTTCCAAAAGCGTGTGAAAAGGGAGCCCTACTCTACTACCAA<br>    | 190079 |
| Query | 24361  | GGTAAAGCAGCCTGTCTTTGCCTAAGATGTAAATGTTGTTTTCTTGGATCCTTTATTTTT<br>    | 24420  |
| Sbjct | 190078 | GGTAAAGTAGCCTGTCTTTGCCTAAGATGTAAATGTTGTTTTCTTGGATCCTTTATTTTT<br>    | 190019 |
| Query | 24421  | CGGTTGATATCAGCTATGGGAAAATTATCCACTACATTATAGATGTTAGATAATATTTCC<br>    | 24480  |
| Sbjct | 190018 | CAGTTGATATCAGCTATGGGAAAATTATCCACTACATTATAGATGTTAGATAATATTTCC<br>    | 189959 |
| Query | 24481  | TTGGGGATGGAGGAGGTGTATTTTACCAACTGACACCTGATTCCAGAGGACGTGCAAAAT<br>    | 24540  |
| Sbjct | 189958 | TTGGGGATGGAGGAGGTGTATTTTACCAACTGACACCTGATTCCAGAGGACGTGCAAAAT<br>    | 189899 |
| Query | 24541  | TGGCAGTGTGAGATAATACACTGCGTGTTAAGGGATGTTTTCTTCAGGAACAAGCTTTCC<br>    | 24600  |
| Sbjct | 189898 | TGGCAGTGTGAGATAGTACACTGCGTGTTAAGGGATGTTTTCTTCAGGAACAAGCTTTCC<br>    | 189839 |
| Query | 24601  | ACTTTAGATAAGAATTCTTCAATTGCTACTCAAAAATTACCTAGACAGAAACATTCTTCA<br>    | 24660  |
| Sbjct | 189838 | ACTTTAGATAAGAATTCTGCAATTGCTACTCAAAAATTACCTAGACAGAAACATTCTTCA<br>    | 189779 |
| Query | 24661  | AGAAAAGCTCCTGTGCTTTTCTAAGGGAACCTACTCTAGAGTTGGGGCTTTTGACTTGA<br>     | 24720  |
| Sbjct | 189778 | AGAAAAGCTCCTGTGCTTTTCTAAGGGAACCTACTCTAGAGTTGGGGCTTTTGACTTGA<br>     | 189719 |
| Query | 24721  | ACCTTATTTCCAATCTTGGTTACCCAGAGTTTCCAAGTGAACAAAAGACCTGTGTGAGCC<br>    | 24780  |
| Sbjct | 189718 | ACCTTATTTCCAATCTTGGTTACCCAGAGTTTCCAAGTGAACAAAAGACCTGTGTGAGCC<br>    | 189659 |
| Query | 24781  | ATCCATAGCATAGCCTGATTCTCAGAGTGTTCCTTCTCTAATTACAGGTGACTTCAGG<br>      | 24840  |
| Sbjct | 189658 | ATCCATAGCATAGCCTGATTCTCAGAGTGTTCCTTCTCTAATTACAGGTGACTTCAGG<br>      | 189599 |
| Query | 24841  | GAGCACATTCAATGGTACGTATTCTGGAATCACTCACTGGTTGTTAGAAAAGGATTCTAC<br>    | 24900  |
| Sbjct | 189598 | GAGCACATTCAATGGTACGTATTCTGGAATCACTCACTGGTTGTTAGAAAAGGATTCTAT<br>    | 189539 |
| Query | 24901  | AGGAAATCTGGAGCTTAACGTCTGGCTTTTGTCTGGAGAGCCTCCATGATCCAAGATATC<br>    | 24960  |
| Sbjct | 189538 | AGGAAATCTGGAGCTTAACGTCTGGCTTTTGTCTGGAGAGCCTCCATGATCCAAGACATC<br>    | 189479 |
| Query | 24961  | TTGTGGGAATGAGGATGTGGGGTATAGTAAAAGAACTGGTTTTCCAGGTGACATACTCT<br>     | 25020  |
| Sbjct | 189478 | TGGTGGGAATGAGGATGTGGGATATAGTAAAGGAACTGGTTTTCCAGGTGACATACTCT<br>     | 189419 |
| Query | 25021  | TTTTATCTATTTATAGTTTCTGGGAACGTGTTACATTAGGTTgtgtgtgtgttatgtgtg<br>    | 25080  |
| Sbjct | 189418 | TTTTATCTATGTATAGTTTCTGGGAATGTGTTACGTTAGGTTGTGTGTGGGTATGTGTG<br>     | 189359 |
| Query | 25081  | tattagggcgggggtggggtagggtggtctgtgtgCAAGTCTGCATGATTTGCTTGTGAA<br>    | 25140  |
| Sbjct | 189358 | TATTAGGGCGGGGGTGGGATGAGGTGGTCTGTGTGCACATCTGCATGATTTGCTTGTGAA<br>    | 189299 |
| Query | 25141  | TGTGTGCTATGTGTGTTTTCCCTAGGaaaaaaTGTGTGTTTACCCAGCACAACTCTC<br>       | 25200  |
| Sbjct | 189298 | TGTGTGCTATGTGTGTTTTCCCCAGGAAAAAATGTTGTGTTTACCCAGCACAACTCTC<br>      | 189239 |
| Query | 25201  | AGTGCCATTTTTCTTAATTTAACAAGTCAGACCACATACTTTACTTACATTAGTTCACAC<br>    | 25260  |
| Sbjct | 189238 | AGTGCCATTTTTCTTAATTTAACAATTCAGACCACATACTTTACTTACATTAGTTCACAC<br>    | 189179 |
| Query | 25261  | CTCATCATCATCATGCCATATGTTGTGAGCTTGTTTTATTGAGCCCACATGCCAGATGGA<br>    | 25320  |
| Sbjct | 189178 | CTCATCATCATCATGCCATATGTTGTGAGCTTGTTTTATTGAGTCCACATGCCAGATGGA<br>    | 189119 |
| Query | 25321  | GAAACTAAGCCACATAAAATAAATGTGCCCTGGTTCACTTGCTGCATAGTGAAGAGTCAAA<br>   | 25380  |
| Sbjct | 189118 | GAAACTAAGCCACATAAAATAAATGTGCCCTGGTTCACTTGCTGCATAGTGAAGAGTCAAA<br>   | 189059 |

|       |        |                                                                |        |
|-------|--------|----------------------------------------------------------------|--------|
| Query | 25381  | ATGTTTACTCATATGGTGCTAATGTTGAAGGCCTGAACTACAACCTCTATTTCAGCCA     | 25440  |
| Sbjct | 189058 | ATGTTTACTCATACGGTGCTAATGTTGAAGGCCTGAACTACAACCTCTATTTCAGCCA     | 188999 |
| Query | 25441  | GTGAAGAGATCACTATTCCACATGCAAGGGAGTTCCAGCACCCCTCTATGCCTGGAATTAC  | 25500  |
| Sbjct | 188998 | GTGAAGAGATCACTATTCCACATGCAAGGGAGTTCCAGCACCCCTCTATGCCTGGAATTAC  | 188939 |
| Query | 25501  | CCACGCCTGCAGAGATCCCAAACGCCACCCCTCACATAAGAGAGCCTCATGATCTCATAA   | 25560  |
| Sbjct | 188938 | CCACGCCTGCAGAGATCCCAAACGCCATCCCTCACATAAGAGAGCCTCATGATCTCATAA   | 188879 |
| Query | 25561  | TCCAGGTAGCTATGTAGACACCTTCCTGCAGGTGTACATAGTCCTTTGTGTGAAACCAA    | 25620  |
| Sbjct | 188878 | TCCAGGTAGCTATGTAGACATCTTCCTGCAGGTGTACATAGTCCTTAGTGGGAAACCAA    | 188819 |
| Query | 25621  | CATAGAAAGCCCATGTTTCTGATCAAATCACAGGTTCTGAAACACTAAGGGAGGCACTAA   | 25680  |
| Sbjct | 188818 | CATAGAAAGCCCATGTTTCTGATCAAATCACAGGTTCTGAAACACTAAGGGAGGCACTAA   | 188759 |
| Query | 25681  | GTAGGACAACGTGGTGCCTGCGTGTATAGCTGGGTCTCCTCAAGACATGGATCAAGTCC    | 25740  |
| Sbjct | 188758 | GTAGGACAATGTGGTGCCTGTGTGTATAGCTGGGTCTCCTCAAGACATGGATCAAGTCC    | 188699 |
| Query | 25741  | AGTAAGAATTGGGGAGACGCTTTAGAGTCTTGATGGAGTTATCACCACAAGCCCTCTGAG   | 25800  |
| Sbjct | 188698 | AATAAGAATTGGGGAGATGCTTTAGAGTCTTGATGGAGTTATCACCACAAGCCCTCTGAG   | 188639 |
| Query | 25801  | CTACACACATTAGGGATCATGACCATTAAGTACTCAAATTACCATTGTTGTTATCCGG     | 25860  |
| Sbjct | 188638 | CTACACACTTTAGGGATCATGACCATTAAGTACTCAAATTACCATTGTTGTTATCCGG     | 188579 |
| Query | 25861  | GTATCTGTCTGCTCCTTGTGGCAACCCCTCTTGTAAGCTGGTGTGGACAGCCTCAGTGCTGG | 25920  |
| Sbjct | 188578 | GTATCCGTCTGCTCCTTGTGGCAACTCTCTTGTAAGCTGGTGTGGACAGCCTCAGTGCTGG  | 188519 |
| Query | 25921  | AGCTGTGCCTCCCTTCGAGTGGACCCCTTCTGTGTTAGCAGGTGGGTACAAGCGTGGGG    | 25980  |
| Sbjct | 188518 | AGCTGTGCCTGCCCTTCGAATGGACCCCTTCTGTGTTAGCAGGTGGGTACAAGCATGGGG   | 188459 |
| Query | 25981  | GTCAGCACACTCAGTGGATTTCACACACAGCATTAAAGAGTAAGGCTGCGCTT---TGT    | 26037  |
| Sbjct | 188458 | GTCAGCACACTCAGTGGATTTCACACACAGCATTGAAGAGTAAGGCTGGGCTTCATTAT    | 188399 |
| Query | 26038  | TTATACATTTTCAATAAATGATGATCTTCATAACATAAAATCAATGATGTAGTACACTAG   | 26097  |
| Sbjct | 188398 | TTATACATTTTCAATAAATGATGATCTTCATAACATAAAATCAATGACGTAGTACACTAG   | 188339 |
| Query | 26098  | AATACTGTCCCTAGTATTGAATCTTGCTCTCAACAAAGGGTTGCTTAAAGTCACATGAC    | 26157  |
| Sbjct | 188338 | AATACTGTCCCTAGTATTGAATCTTGCTCTCAACAAAGGGTTGCTTAAAGTCACATGAC    | 188279 |
| Query | 26158  | AGATTCCATTCAACTGATGACACATGCTGTAGCAGCAGTTAAAGCAGTCATTTGAAAAGG   | 26217  |
| Sbjct | 188278 | AGATTCCATTCAACTGATGACACATGCTGTAGCAGCAGTTAAAGCAGTCATTTGAAAAGG   | 188219 |
| Query | 26218  | CTTTTACTATAAACTTATGTGTGAGCCTGAAGTGGGGGATAAAAAGAGGTGATTAGCTACC  | 26277  |
| Sbjct | 188218 | CTTTTACTATAAACTTATGTGTGAGCCTGAAGTGGGGGATAAAAAGAGGTGATTAGCTCCC  | 188159 |
| Query | 26278  | CTGTGCCATGTTTCTATTATGTGTGTTGGTGGAGGAAAAATTACACAGGAAGGTGATGGAGA | 26337  |
| Sbjct | 188158 | CTGTGCCATGTTTCTATTATGTGCATGGTGGAGGAAAAATTACACAGGAAGGTGATGGAGA  | 188099 |
| Query | 26338  | GAACAGAGCAAAGGATTGGACAGGTCCATTGAACCCATAAGACTATGTTGAGGTTAGTGA   | 26397  |
| Sbjct | 188098 | GAACAGAGCAAAGGATTGGACAGGTCCATTGAACCCATAAGACTATGGTGAGGTTAGTGA   | 188039 |
| Query | 26398  | ATGAGACTGGTCATTTTAGGTCAAATTTTACCCAGAGCTGGTGCAACCACTGCCCATTTCT  | 26457  |
| Sbjct | 188038 | ATGAGATTGGTCATTTTAGGTCAAATTTTACCCAGAGCTGGTGCAACCACTGCCCATTTCT  | 187979 |
| Query | 26458  | TAGCCAGACCTTATGTGCAGGTAGCTCTGATCAATAGTCAAGGAGGCAGTGGGGGTTGCAG  | 26517  |
| Sbjct | 187978 | TAGCCAGACCTTATGTGCAGGCAGCTCCGATCAATAGTCAAGGAGGCAGTGGGGGTTGCAG  | 187919 |
| Query | 26518  | ACTTAATTCATTAATAACACCAAAGCACCAGCCACATGGCCACTTTTCCAGTTAATTCAC   | 26577  |
| Sbjct | 187918 | ACTTAATTCATTAATAACACCAAAGCACCAGCCACACGGCCACTTTTCCAGTTAATTCAC   | 187859 |
| Query | 26578  | AGTAGCTTGCATATTCAGGTTTGATCATTGGAAGCGAAGTTACTCTTTGCAGACCCATCT   | 26637  |
| Sbjct | 187858 | AGTAGCTTGCATATTCAGGTTTGATCAGTGAAGGGAAGTTACTCTTTGCAGACCCATCT    | 187799 |
| Query | 26638  | TTTGACAATCATTTTGCAGTGTGAGAAGGTCTGAGCAGCCTCGGGAGGCAAGCAGTCCCT   | 26697  |
| Sbjct | 187798 | TTTGACAATCATTTTGCAGTGTGAGAAGGTCTGAGCAGCCTCGGGAGGCAAGCAGTCCCT   | 187739 |
| Query | 26698  | GGTCCCTCAGTGTAGTCACTGGAGGAGACAGTCACCTGAGAGGCAGCTGGCAGGGTGAAGG  | 26757  |
| Sbjct | 187738 | GGTCCCTCAGTGTAGTCACTGGAGGAGACAGTCACCTGAGAGGCAGCTGGCAGGGTGAAGG  | 187679 |
| Query | 26758  | GAAAGGGGAGGCAGGCCACAGAGATGACAGCCTTTAAGCTGTCATACTGGGGAAGTCAAG   | 26817  |
| Sbjct | 187678 | GAAAGGGGAGGCAGGCCACAGAGATGACAGCCTTTAAGCTGTCATACTGGG-AGGTCAAG   | 187620 |
| Query | 26818  | GATCTGAAAGAGGAAGGAGAATTCTTTATCATTAAGGACCTGTCTTATCTCAGGCATTT    | 26877  |
| Sbjct | 187619 | GATCTGAAAGAGGAAGGAGAATTCTTTATCATTAAGGACCTGTCTTATCTCAGGCATTT    | 187560 |
| Query | 26878  | CCTCCAGAGCATCACCTTTGTCCACCCACACACCTTGGGCTAGGAGGACTGGGGAAGAC    | 26937  |
| Sbjct | 187559 | CCTCCAGAGCATCACCTTTGTCCACCCACACACCTTGGGCTAGGAGGACTGGAGAAAGAC   | 187500 |
| Query | 26938  | AGTGAAGGGCCTCTTGGGTCTCTGGCACAGGGCGTGATGAAGAGGTGGCAGTTTTTCAGG   | 26997  |
| Sbjct | 187499 | AGTGAGGGGTCTCTTGGGTCTCTGGCACAGGGCGTGATGAAGAGGTGGCAGTTTTTCAGG   | 187440 |
| Query | 26998  | AAACTCTCTCTCTAGGGAACCAATACATTTCCCATCTCAGGTCTTCACTCAGCGGGGT     | 27057  |
| Sbjct | 187439 | AATCTCTCTCTCTAGGGAACCAATACATTTCCCATCTCAGTCCCTCACTCAGCGGGGT     | 187380 |
| Query | 27058  | TGAGGTTCTGCTCGTCACTTATCATCTCTGAATGTCAGCACCCCTCAAGTGTAATACTCA   | 27117  |
| Sbjct | 187379 | TGAGGTTCTGCTCGTCACTTATCATCTCTGAATGTCAGCACCCCTCAAGTGTAATACTCA   | 187320 |
| Query | 27118  | GCCACAGCCCTCTCTGCAACCCCTGCAGGGCTGATGTTCTCCATAAACCATAAAGGCAT    | 27177  |
| Sbjct | 187319 | GCCACAGCCCTCTCTGCAACCCCTGCAGGGCTGATGTTCTCCATAAACCATAAAGGCAT    | 187260 |
| Query | 27178  | CATGCCCACGGAAAAGCTGAACAGGAAGCATGCTCCACTGCCCCGAGCCATCCAAGTT     | 27237  |
| Sbjct | 187259 | CATGCCCACGGAAAAGCCGAACAGGAAGCATGCTCCACTGCCCCAGGCCATCCAAGTT     | 187200 |
| Query | 27238  | CCCCCTCCATATTCCACCACTGCTAAGTGTCCAGCTTATTCCTCCTGGCATGTAGTAAAC   | 27297  |
| Sbjct | 187199 | CCCCCTCCATATTCCGCCACTGCTAAGTGTCCAGCTTATTCCTCCTGGCATGTAGTAAAC   | 187140 |
| Query | 27298  | ACTTAGAGAACATTACTGAAGTACCAGTCTCTCTAAGGTTTTCTCTGTATTTAGTGATTT   | 27357  |
| Sbjct | 187139 | ACTTAGAGAACATTACTGAAGTACCAGTCTCTCTAAGGTTTTCTCTGTATTTAGTGATTT   | 187080 |
| Query | 27358  | TTTAGCCCCGTACTGTGATACTAAGAAGTAGGGCCTAAATAGGGCCTAAAAAGTATTGCT   | 27417  |
| Sbjct | 187079 | TTTAGCCCTGTACTGTGATACTAAGAAGTAGGGCCTAAATAGGGCCTAAAAAGTATTGCT   | 187020 |
| Query | 27418  | AAAATTACATTATGACAGTGCAGAGAAGCTGAGGGCAGAGGGAGGCATGAGATTTCTAGG   | 27477  |
| Sbjct | 187019 | AAAATTACATTATGACAGTGCAGAGAAGCTGAGGGCAGAGGGAGGCATGAGCTTGCCAGG   | 186960 |
| Query | 27478  | TCCACATGGCTTAGTGGAATTTGAATCCGGGCCCCCACTCTGCACCAGCCCTGCACTCAC   | 27537  |
| Sbjct | 186959 | TCCACATGGCTTAGTGGAATTTGAATCCGGGCCCCCACTCTGCACCAGCCCTGCACTCAC   | 186900 |
| Query | 27538  | AGTCATCCTGCTGTGTTCTCTCTCCAGGAAGGCAGTGGCCACACAGTCTGTCTGATAGA    | 27597  |
| Sbjct | 186899 | AGTCATCCTGCTGTATTCTCTCTCCAGGAAGGCAGTGGCCACGCAGTCTGTCTGATAGA    | 186840 |
| Query | 27598  | GGTGTTGAGTGCTCACTGAACTCCGTGATCTTCTTGAAACCCAACTTTGATTCAGTGGGC   | 27657  |
| Sbjct | 186839 | GGTGTTGAGTGCTCACTGAACTCCGTGATCTTCTTGAAACCCAACTTTGATTCAGTGGGC   | 186780 |
| Query | 27658  | TCTGCTTGGAAGCCTGTAAAGAAAAACATCATAAGTTTAAACTTAGAACAGATTATCACT   | 27717  |
| Sbjct | 186779 | TCTGCTTGGAAGCCTGTAAAGAAAAGGATCATAAGTTTAAACTTAGAACAGATTATCACT   | 186720 |
| Query | 27718  | GTTTTCCCTCTGGTCTTCAGTCAGCAAGATGTCAACAGCCCTATCTATTGTAAATGCGTT   | 27777  |
| Sbjct | 186719 | ATTTTCCCTCTGGTCTTCTGTGACGAAGATGTCAACAGCCCTATCTATTGTAAATGCATT   | 186660 |
| Query | 27778  | AACCAGCATCTTCTCTGATAGAGAATACAAGAAGATATGCTGTGCACACCAACCAGTGTC   | 27837  |
| Sbjct | 186659 | AACCAGCATCTTCTCTGATAGAGAATACAAGAAGATATGCTGTGCACACCAACCAGTGTC   | 186600 |
| Query | 27838  | GGAGACCTCATGGCTCCCCGGTAAAGAAGAAGATGTACCCACAAGAAGGTACTGTGGAAG   | 27897  |
| Sbjct | 186599 | GGAGACCTCATGGCTCCCCGGTAAAGAAGAAGAGGTACCCACAAGAAGGTACTGTGGAAG   | 186540 |
| Query | 27898  | TTCATTAATTAAGTTGCTTCAAGAATTGCAATTGCGGGGAGTATTCAGTGTCCCATATGT   | 27957  |

|       |        |                                                                 |        |
|-------|--------|-----------------------------------------------------------------|--------|
| Sbjct | 186539 | TTCATTAATTAAGTTGATTCAAGAATTGCAATTGCGGGGAGTATTCAGTGTCCCATATGT    | 186480 |
| Query | 27958  | AAGAGGAAACTATGAAGAGACTAAGCCATATTTTTTAATGTGTCTCAGGATTCCTAATTTGCC | 28017  |
| Sbjct | 186479 | AAGAGGAAACTATGAAGAGACTAAGCCATATTTTTTAATGTGTCTCAGGATTCCTAATTTGCC | 186420 |
| Query | 28018  | TGGTCAGTAAATATTGCTACAACCACAAAAGTAAATATCTACTTAAAAGTCAATTGTGGT    | 28077  |
| Sbjct | 186419 | TGGTCAGTAAATATTGCTACCACCACAAAAGTAAATATCTACTTAAAAGTCAATTTTGGT    | 186360 |
| Query | 28078  | TCATGTTTAAATGATAGACAATGTTTCAAGCTAATGTCTAGAACTTACCTGGTTGTTAAAC   | 28137  |
| Sbjct | 186359 | TCATGTTTAAATGATAGACAATGTTTCAAGCTAATGTCTAGAACTTACCTGGTTGTTAAAC   | 186300 |
| Query | 28138  | ATAAGCATAGATCTCCCTGAAAGAGTGGTGCTATATTATTATTTTCAATTAATATATTT     | 28197  |
| Sbjct | 186299 | ATAAGCATAGATCTCCCTGAAAGAGTGGTGCTATATTATTATTTTCAATTAATATATTT     | 186240 |
| Query | 28198  | CTTTAGAGAGTTTTAAATTGACATAAAAACTGAGCATATGGCCAGGCGTGGTGGCTCACG    | 28257  |
| Sbjct | 186239 | CTTTAGAGAGTTTTAAATTGACATAAAAACTGAGCATATGGCTGGGCGTGGTGGCTCACA    | 186180 |
| Query | 28258  | CTTATAAACCCAGCACTTTAGGAGGCCAAGGCAGGCGGATCATCTGAGGTCAGGAGTTGG    | 28317  |
| Sbjct | 186179 | CTTATAATCCGACACTTTAGGAGGCCAAGGCAGGCGGATCATCTGAGGTCAGGAGTTGG     | 186120 |
| Query | 28318  | AGACCAGCCTGGCCAAACATGGTGAAACCCCATCTCTACTAAAAATACaaaaaaTTAGCC    | 28377  |
| Sbjct | 186119 | AGACCAGCCTGGCCAAACATGGTGAAACCCCATCTCTACTAAAAATACAAAAAATTAGCC    | 186060 |
| Query | 28378  | CGGTATGGTGGCAGGCGCCTGTAATCCCAGCTACTCAGGAGGCTGAGGCAGGAGAATCGC    | 28437  |
| Sbjct | 186059 | GGGTGTTGGTGGCAGGTGCCGTGAATCCCAGCTACTCAGGAGGCTGAGGCAGGAGAATCGC   | 186000 |
| Query | 28438  | TTGAACCCGGGAGGCAGAGGTTGCAGTGAGCCAAGATCATGCCATTGCACTCCAGCCTGG    | 28497  |
| Sbjct | 185999 | TTGAACCCAGGAGGCAGAGGTTGCAGTGAGCCAAGATCATGCCATTGCACTCCAGCCTGG    | 185940 |
| Query | 28498  | GTGACAAGAGTGAAACTCCATCTCaaaaataaataaataaataaataaataaataa        | 28557  |
| Sbjct | 185939 | GTGACAAGAGTGAAACTCCATCTCAAAATAAAATAAATAAAATAAAATAAA-----        | 185888 |
| Query | 28558  | taaaaatTGAGTATATAATACACGAAGTCCCATATTATTCTGTCTCCTCATCCTCACTT     | 28617  |
| Sbjct | 185887 | ----AATTGAGTATATAATACACAAAGTCCCATATTATTCTGTCTCCTCACCTCACTT      | 185832 |
| Query | 28618  | CCTAATTTCACTTATTAGTAACATCTTACATTACTGTGGTACATTGCTAGAATAATGAG     | 28677  |
| Sbjct | 185831 | CCTAATTTCACTTATTAGTAACATCTTACATTACTGTGGTACATTGCTAGAATAATGAG     | 185772 |
| Query | 28678  | AAAATATTGATACATTATTATCTAAAGTCTACATTTGCATAATGTTCAATCTTTCTGTTA    | 28737  |
| Sbjct | 185771 | AACATATTGACACATTATTATCTGAAGTCTACATTTGCATAATGTTCAATCTTTCTGTTA    | 185712 |
| Query | 28738  | TACATATATATGAATTTTGAAATATTTAAACATTATGTTCACCCTTATGGTCTCATAAA     | 28797  |
| Sbjct | 185711 | TACATATATATGAATTTTGAAATATTTAAACATTATGTTCACCCTTATGGTCTCATAAA     | 185652 |
| Query | 28798  | GAAAATGTTCACTTCCCTAAAAATCCTCTCTTCTCATTAATCTCTGTCTCTTTCTCCAG     | 28857  |
| Sbjct | 185651 | GAAAATGTTCACTTCCCTAAAAATCCTGTCTTCTCATTAATCTCTGTCTCTTTCTCCAG     | 185592 |
| Query | 28858  | AAACCATGGCAACTATTAACATTTTACTATCGCTTCAACTTTGCCTTTTCAGAATGTC      | 28917  |
| Sbjct | 185591 | AAACCTTGGCAACTATTAATATTTTACTATCGCTTCAGCTTTGCCTTTTCAGAATGTC      | 185532 |
| Query | 28918  | GTATAGTTGGAATCATATATTATGTAGTTTTTTCAGATGAATTTATTGCACATAATTGAT    | 28977  |
| Sbjct | 185531 | ATATAGTTGGAATCATATATTATGTAGTTTTTTCAGATGAATTTATTGTACTAAATTGAT    | 185472 |
| Query | 28978  | GTACGCTTTAGCTGCTTTTCATGTCTTTTTTATGCCTTAATGGCAAAAAATGGCACATTAA   | 29037  |
| Sbjct | 185471 | GTACGCTTTAGCTGCTTTTCATGTCTTTTTTATGCCTTAATGGCAAAAAATGGCACATTAA   | 185412 |
| Query | 29038  | ATCACCAAAATAATATTGCATTAATGAATTTTTGTCTTTTTATTTCGCCTGTTGAAGAATT   | 29097  |
| Sbjct | 185411 | ATCACCAAAATAATATTGCATTAATGAATTTTTGTCTTTTTATTTCACCTGTTGAAGAATT   | 185352 |
| Query | 29098  | CGGTAGATTTTCATGAGAGAAACCATCTGGGCCTGGTGCCTTCTTTTCGGAATGCTCTTA    | 29157  |
| Sbjct | 185351 | CGGTAGATTTTCATGAGAGAAACCATCTGGGCCTGGTGCCTTCTTTTCGAGAATGCTCTTA   | 185292 |
| Query | 29158  | ATGTGAATTCAACTTATTTAATAGACATAAGTTTATTCACATTAGGATTCTAGCGTGACC    | 29217  |
| Sbjct | 185291 | ATGTGAATTGAACCTATTTAATAGACATAAGTTTATTCAAATTAGGATCCTAGCATGACC    | 185232 |
| Query | 29218  | TTGGGAAGATTGCCTTTCAAGGAATTGATAAAATTCACTGAGGTTATCAAACGCGGTCA     | 29277  |
| Sbjct | 185231 | TTGGGAAGATTGCCTTTCAAGGAATTGATACATTTCACTGAGGTTATCAAACGCGGTCA     | 185172 |
| Query | 29278  | TAGAACTGTTCAATAATATTCCTTTTAAATGCCTAACAGTTCAGTAGAGATGGCTCCTCTTT  | 29337  |
| Sbjct | 185171 | TAGAAATGTTCATGATATTCCCTTTAATGCCTAACAGTTCAGTAGAGATGGCTCCTCTTTT   | 185112 |
| Query | 29338  | TATTTCTGAAATTTGGTCATTTGTGTATCTTCTTTTCTTGGTTAGCCTGCATATCAATT     | 29397  |
| Sbjct | 185111 | TATTTCTGAAATTTGGTCATTTGTGTATCTTCTTTTCTTGGTTAGCCTGCATATCAATT     | 185052 |
| Query | 29398  | CATTCATTGTAATGAGCATATCAAAGAACCAGCttttgggttttattgattttctgatgat   | 29457  |
| Sbjct | 185051 | CATTCATTGTAATGAGCATATCAAAGAACCAGCTTTTGGTTTTATTGATTTTCTGATGAT    | 184992 |
| Query | 29458  | ttcagtgtttttaatttttattgatttctgtgatgttgtttattaCTTTTACTTGCTTTCCA  | 29517  |
| Sbjct | 184991 | TTCAGTGTTTTAATTTTATTGATTTCTGTGATGTGTTTATTACTTTTACTTGCTTTCCA     | 184932 |
| Query | 29518  | TTGCATTCCCTCTATTTTCTACAGTTC CCTAATTGAAACATGATATTACTGATTTTAGATC  | 29577  |
| Sbjct | 184931 | TTGCATTCCCTCTATTTTCTATAGTTC CCTAATTGAAACATGATATTACTGATTTTAGGTC  | 184872 |
| Query | 29578  | TTGTGATTTTTTAGTATATTACATCCAATGCTATAGATTTCCCTCTAAGGACTGCCTTTGC   | 29637  |
| Sbjct | 184871 | TTGTGATTTTTTAGTATATTGCATCCAATGCTATAGATTTCCCTCTAAGGACTGCCTTTGC   | 184812 |
| Query | 29638  | TACATCCAGAAATCTTGCCAAGTCACATTTTCTTTTAAATGTAGTTAAAAGTATTTTTAAT   | 29697  |
| Sbjct | 184811 | TACATCCAGAAATCTTGCCAAGTCACATTTTCTTTTAAATGTAGTTAAAAGTATTTTTAAT   | 184752 |
| Query | 29698  | TTTCTATTGAGACTTCTTCTTTAACCCATGAGTTATTTAAAAGTGCATTGCTAATTGCA     | 29757  |
| Sbjct | 184751 | TTTCTATTGAGACTTCTTCTTTAACCCATGAGTTATTTAAAAGTGCATTGCTAATTGCA     | 184692 |
| Query | 29758  | AATATTTGGGGATTTTGTGGCTCTTTTACAGTTGTTGATTTTTTGTGTGCAGGTATGTGT    | 29817  |
| Sbjct | 184691 | AATATTTGGGGATTTTGTGGCTCTTTTACAGTTGTTGATTTTTTGTGTGCAGGTATGTGT    | 184632 |
| Query | 29818  | TGCAAAAGCAGTCATCTACCTCATCTTGCCACCACCCAAGATGGCCCAGGATGTGGGCTC    | 29877  |
| Sbjct | 184631 | TGCAAAAGCAGTCGTCATCTACCTCATCTTGCCACCACCCAAGATGGCCCAGGATGTGGGCTC | 184572 |
| Query | 29878  | TCCCTGAGTGAATCTTTGGCAATCTGCCAACCTGATGTGGTCGGCCTCCTTCTTTAGTCT    | 29937  |
| Sbjct | 184571 | TCCCTGAGTGAATCTTTGGCAATCTGCCAACCTGATGCGTTTCGGCTCCTT---TAGTCT    | 184515 |
| Query | 29938  | GAGCTTGCTCTCTGCTTAGAAAGGGCCATTCTCAGTTCTGGCAGGGAGTTTCCCAACAT     | 29997  |
| Sbjct | 184514 | GAGCTTGCCCTTCTGCTTAGAAAGGGCCATTCTCAGTTCTGGCAGGGAGTTTCCCAACAT    | 184455 |
| Query | 29998  | TGAGAAGGTGGCATTTCTACTCCCCAGTGCAGCCTGCACCTCTGACCGGTGGTCAGCAGA    | 30057  |
| Sbjct | 184454 | TGAGAAGGTGGCATTTCTACTCCCCACTGCAGCCTGCACCTCTGACCGGTGGTCAGCAGA    | 184395 |
| Query | 30058  | CAGGACAGAGGTCCTCATTAGACAGAGTTCAGCGGGGTCTCTGACCAAAGGGCATCTTCA    | 30117  |
| Sbjct | 184394 | CAGGACAGAGGTCCTCATTAGACAGAGTTCAGCGGGGTCTCTGACCAAAGTGCATCTTCA    | 184335 |
| Query | 30118  | GAGTCTGCACCTACCCACTGTGACCATGGGCAGGCTCTGAGTCCTAAAGCAGGAGGAACC    | 30177  |
| Sbjct | 184334 | GAGTCTGCACCTACCCACTGTGACCAAGGGCAGGCTCTGAGTCCTAAAGCAGGAGGAAC     | 184275 |
| Query | 30178  | GTGCGACCATCCTGATTGGAAAATTGTGAGGATCACCATGTTACTCAAGTAAGGTCCTTG    | 30237  |
| Sbjct | 184274 | GTGCGACCATCCTGATTGGAAAATTGTGAGGATCACCATGTTACTCAAGTAAGGTCCTTG    | 184215 |
| Query | 30238  | GAAAGTGTCTGATTACTACTGTTTGTGAACCTTCTGTTGGTGGCCTGGCTGAGCCACACA    | 30297  |
| Sbjct | 184214 | GAAAGTGTCTGATTACTACTGTTTGTGAACCTGTTGTTGGTGGCCTGGCTGAGCCACACA    | 184155 |
| Query | 30298  | CTTTATGAAAACAGGACCCCTCAGCTGGTGTGGGTGTCTATGCAGCCTGAGACCCTCAT     | 30357  |
| Sbjct | 184154 | CTTTATGAAAACAGGACCCCTCAGCTGGTGTGGGTGTCTATGCAGCCTGAGACCCTCAT     | 184095 |
| Query | 30358  | GTGAACAGCCTCGTGGTAGCTGTCTTTGCCCTTGCCACCATCAGTGCCTCCTTGTTCCT     | 30417  |
| Sbjct | 184094 | GTGAACAGCCTCGTGGCAGCTGTCTTTGCCCTTGCCACCATCAGTGCCTCCTTGTTCCT     | 184035 |
| Query | 30418  | GGGCACCTGCTTTCTCTGATGGTGCTCCATTGTTTTCTGCACCTCAGTGTCTACAGCTGG    | 30477  |
| Sbjct | 184034 | GGGCACCTGCTTTCTCTGATGGTGCTCCATTTTTTCTGCACCTCAGTGTCTACAGCTGG     | 183975 |
| Query | 30478  | ATGTCTCTTCTGCAATCTAGGTGAGGGGGCATCAATAACAGTTCTGCTGTGGCACTGCCC    | 30537  |

|         |        |                                                                  |        |
|---------|--------|------------------------------------------------------------------|--------|
| Sbjct   | 183974 | ATGTCTCTTCCGCAATCTAGGCAGAGGGGGCATCAATGGCAGTTCTGCTGTGGCACTGCC     | 183915 |
| Query   | 30538  | TCCTTCTTAGCTTGCTCTTGCTCCGTCCTTAGGCTCCCTCAAAGATCCCACCCCTTCAGGTTCT | 30597  |
| Sbjct   | 183914 | TCCTTCTTAGCTTGCTCTTGCTCTGTCTTAGGCTCCCTGAAAGATCCCACCCCTTCAGGTTCT  | 183855 |
| Query   | 30598  | TTCCACAAGTTTCTTTATTGAAATCCGAGCAGAAAACATATGACCAATATGACCAATCGTAT   | 30657  |
| Sbjct   | 183854 | TTCCACAAGTTTCTTTATTGAAATCCGAGCAGAAAACATATGACCAATATGACCAATCCTAT   | 183795 |
| Query   | 30658  | ACCCACTGAAGACATGAATGTAGAATTAACAATTCCTCATGGACTCTACCATATAGAT       | 30717  |
| Sbjct   | 183794 | ACCCACTGAAGACATGAATGAAGAATTAACAATTCCTCATGGACTCTACCATATAGAT       | 183735 |
| Query   | 30718  | CCCTAGAAGTAATTTCTTCAAAAAAAAAAAAAA---TCAAGGAAGATGTAATAGTTTTCCA    | 30774  |
| Sbjct   | 183734 | CCCTAGAAGTAATTTCTTAAAAAAAAAAAAAAAAAATCAAGGAAGATGTAATAGTTTTCCA    | 183675 |
| Query   | 30775  | TAAATTAGAATACCCTACATGTACAATTAATGAAATGGCTAGTATAGTCTTGAAACCAA      | 30834  |
| Sbjct   | 183674 | TAAATTAGAATACCCTACATATACAATTAATGAAATGGCTAGTATAGTCTTGAAACCAA      | 183615 |
| Query   | 30835  | AACCAGATAAGGTAATAATTAAATTCGTGATATTTTAAAAACTGTAAATTCGACTAATG      | 30894  |
| Sbjct   | 183614 | AATCAGATAAGGTAATAATTAAATTCGTGATATTTTAAAAACTGTAAATTCGACTAATG      | 183555 |
| Query   | 30895  | TGAGTTAATCTCAAAATATGAAATAGTAGATTAACATTGAAAAATGCAATAAATAAAATTA    | 30954  |
| Sbjct   | 183554 | TGAGTTAATCTCAATATATGAAATAGTAGATTAACATTGAAAAATGCAATAAATAAAATTA    | 183495 |
| Query   | 30955  | GCTACCTCAAGAGTTTAATGGAAAAAATGTTGATTATTGCAATAGATTGAGAAATTCGT      | 31014  |
| Sbjct   | 183494 | GCTACCTCAAGAGTTTAATGGAAAAAATGTTGATTATTGCAATAGATTGAGAAATTCAT      | 183435 |
| Query   | 31015  | GAATAACATTCACCCATATATTGTAGGACAACATCTCTGATTAA-----GTGACCTGTGA     | 31068  |
| Sbjct   | 183434 | GAATAACATTCACCCATATATTGTAGGACAACATCTCTGATTAACTTTAAGTGACCTGTGA    | 183375 |
| Query   | 31069  | CAACCATTGGAATTAATGCTGCTTTACAGCATATCTCTTGGCTTGTTAAAAACCCGACA      | 31128  |
| Sbjct   | 183374 | CAACCATTGGAATTAATGCTGCTTTACAGCATATCTCTTGGCTTGTTAAAAACCCGACA      | 183315 |
| Query   | 31129  | AGAATTTCCATAACATTAATTTATTTTTTAACACCTATATTGGGTGTGAACCCACCATAAA    | 31188  |
| Sbjct   | 183314 | AGAATTTCCGTAAACATTAATTTATTTTTTAACACCTATATTGGGTGTGAACCCACCATAAA   | 183255 |
| Query   | 31189  | GTTTGCCCACTGAAAAGGCTGCAATTTGATGCTTTATTAAATGATACGTGTGCAACCC       | 31248  |
| Sbjct   | 183254 | GTTTGCCCACTGAAAAGGCTCACAATTTGATGCTTTATTAAATGATACGTGTGCAACCC      | 183195 |
| Query   | 31249  | AACACCAGCATCTAATTTAAATATGTTTCCCTCACCCAAGTTCCTCTTGTGCACTGGCA      | 31308  |
| Sbjct   | 183194 | AACACCATGATCTAATTTAAATATGTTTCCCTCACCCAAGTTCCTCTTGTGCACTGGCA      | 183135 |
| Query   | 31309  | GTTAATCCCACTCCCATCTCCAGCCCTAAGCAATACTGCTGTGACATTCCATCTCCATA      | 31368  |
| Sbjct   | 183134 | GTTAATCCCACTCCCATCTCCAGCCCTAAGCAATACTGCTGTGACATTCCATCTCCATA      | 183075 |
| Query   | 31369  | AATTTCCCACTTGCTTTATAGAAATGGACatatatatatat--TTGGAATCTGACTTCCT     | 31426  |
| Sbjct   | 183074 | AATTTCCCGCTTGCTTAATAGAAATGGACATATATATATATATTGGAATCTGACTTCCT      | 183015 |
| Query   | 31427  | TCATTTAGCATACTATGTTTGAAGTTAATTGACGTGTAGCACGTGCTGGTCATGTGTTT      | 31486  |
| Sbjct   | 183014 | TCATTTAGCATACTATGTTTGAAGTTAATTGACGTGTAGCACGTGCTGGTCATGTGTTT      | 182955 |
| Query   | 31487  | TCCTTCATAGTCTGCTGTGTTTATTCATACAGATAGTGTTTATTTCATTATCAGTTAATG     | 31546  |
| Sbjct   | 182954 | TCCTTCATAGTCTGCTGTGTTTACTCATACAGATAGTGTTTATTTCATTATCAGTTAATG     | 182895 |
| Query   | 31547  | GACATTTAATTATTTTGTttttttCTTTGATGAGTAATGTAGCTTTGAGCATTATATAC      | 31606  |
| Sbjct   | 182894 | GACATTTAATTATTTTGTATTTTCTTTGATGAGTAATGTAGCTTTGAGCATTATATAC       | 182835 |
| Query   | 31607  | AGTCATGTAATGCATAATGACATTTTGCTCAaaaaaaaaatttttttttCTGAGACCCA      | 31666  |
| Sbjct   | 182834 | AGTCACATAATGCATAATGACATTTTGGT-AAAAAAAA-ATTTTTTTTTCTGAGACCCA      | 182777 |
| Query   | 31667  | GGCTGGAGTGCAGTGGCACAATCTCAGCTCACTGGAACCTCCACCTCCCAGGTTTAAGCA     | 31726  |
| Sbjct   | 182776 | GGCTGGAGTGCAGTGGCACAATCTCGGCTCACTGGAACCTCCACCTCCCAGGTTTAAGCA     | 182717 |
| Query   | 31727  | ATTCTCATGCCTCAACCTCCCGAGTAGCTGGGACAACCTGGCACACACCACACGCATGGA     | 31786  |
| Sbjct   | 182716 | ATTCTCATGCCTCAACCTCCCGAGTAGCTGGGACAACCTGGCACACACCACACGCCTGGA     | 182657 |
| Query   | 31787  | TAATTTTGTATTTTCAGTAGAGACAGATTTTGCTGTGTTGGTCAGGCTAGTCTCAAAC       | 31846  |
| Sbjct   | 182656 | TAATTTTGTATTTTCAGTAGAGACAGATTTTGCTGTGTTGGTCAGGCTAGTCTCAAAC       | 182597 |
| Query   | 31847  | TCCTAGCCTCAGGTGATCGCCCACTCTGCCTCTCAAGTGCTGGGATTATAGGCATGA        | 31906  |
| Sbjct   | 182596 | TCCTAGCCTCAGGTGATCCACCACCTCTGCCTCCCAAGTGCTGGGATTATAGGCATGA       | 182537 |
| Query   | 31907  | GCCACCACACCAGCCTAAtttttttAAGAAAC--GAGAACTATTTTCTAAATTACTTTT      | 31964  |
| Sbjct   | 182536 | GCCACCACACCAGCCTAATTTTTTTAAGAACAAGAGAACATTTTCTAAATTTCCTTTT       | 182477 |
| Query   | 31965  | GCCAATTTATATTCTTACCATGATGCATAGTACTAATTTCACTGTACAATGTATGGTAGG     | 32024  |
| Sbjct   | 182476 | GCCAATTTATATTCTTACCATGATGCATAGCACTAATTTACCGTACAATGTATGGTAGG      | 182417 |
| Query   | 32025  | CCCCAATATGTAAGAAATGATGAAAGTAACACATAAAGATTAGTATAAAACAAATGAGAT     | 32084  |
| Sbjct   | 182416 | CCCCAATATGTAAGAAATGATGAAAGTAACACATAAAGATTAGTATAAAACAAATGAGAT     | 182357 |
| Query   | 32085  | TATCATTTGTTGCTATCATCTTTGTCAAATTCGAAAACAATCTGAGTATATTTTATATA      | 32144  |
| Sbjct   | 182356 | TATCATTTGTTGCTATCATCTTTGTCAAATTCGAAAACAATCTGAGTATATTTTATATA      | 182297 |
| Query   | 32145  | AATATGCTTGGCAACATAGCTGAAAAAAGCATTATCAGTTACATTTATCAGTAACAAAGA     | 32204  |
| Sbjct   | 182296 | AATATGCTTGGCAACATAGCTGAAAAAAGCATTATCAGTTACATTTATCAGTAACAAAGA     | 182237 |
| Query   | 32205  | CATAAATTTGAAGGGGGAAAAACACTTGTACTAACACGCAATGTCAGAATTAACATAAA      | 32264  |
| Sbjct   | 182236 | CATAAATTTGAAGGGGGAAAAACACTTGTACTAACACGCAATGTCAGAATTAACATAAA      | 182177 |
| Query   | 32265  | AATTCTGCTGGTCACTTTTGAATATTTAATTGCCTGGGGCAGTGTTTAGTAGACAAATGA     | 32324  |
| Sbjct   | 182176 | AATTCTGCTGGTCACTTTTGAATATTTAATTGCCTGGGGCAGTGTTTAGTAGACAAATGA     | 182117 |
| Query   | 32325  | GCAACTATGGAGCACCCAAAGTAGGGGAATCAACAGAACTTGGGTTTCAAAGTTATCTG      | 32384  |
| Sbjct</ |        |                                                                  |        |

|       |        |                                                                |        |
|-------|--------|----------------------------------------------------------------|--------|
| Query | 33036  | TTCTTACAAAACCTTGTCACAATAAGCAATATAGCGCCTTCCCCCTATTTCCAGCCCAT    | 33095  |
| Sbjct | 181396 | TTCTTACAAAACCTTGTCACAATAAGCAATATAGTGCCTTCCCCCTATTTCCAGCCCAT    | 181337 |
| Query | 33096  | GGTGATTCCCTATCC-AC TTTCCTCTGTATGAATTTGACTATTCTAGGCACTTCATGTAAG | 33154  |
| Sbjct | 181336 | GGTGATTCCCTATCCCACTTTCTCTGTATGAATTTGACTATTCTAGGCACTTCATGTAAG   | 181277 |
| Query | 33155  | TACAATTATACAATATATTCC TTTTGTGTCTGGCTTATTTCACTAAGCATAATGTTCTCA  | 33214  |
| Sbjct | 181276 | TACGATTATACAATATATTCC TTTTGTGTCTGGCTTATTTCACTAAGCATAATGTTCTCA  | 181217 |
| Query | 33215  | ATGTCCACCCCATGTTGTATCATCTACCAAAATTATGTTCGTTTTTTACAGATGGATGATG  | 33274  |
| Sbjct | 181216 | ATGTCCACCCCATGTTGTATCATCTATCAAAATTATGTTCGTTTTTTACAGATGGATGATG  | 181157 |
| Query | 33275  | TAGCATTGCATGTAGACCACCTTGCTTTTATTACATTCA TTGTTCACTGATGGTTGGAT   | 33334  |
| Sbjct | 181156 | TAGCATTGCATGCAGACCACCTTGCTTTTATTACATTCA TTGTTCACTGATGGTTGGAT   | 181097 |
| Query | 33335  | TATTTCCACCTTTTGCCTCCTGTGAAAAGTGATGCTATAAACATTAGTATACAAGCATCT   | 33394  |
| Sbjct | 181096 | TATTTCCACCTTTTGGCTCCTGTGAAAAGTGATGCTACAAACATTAGTATACAACATCT    | 181037 |
| Query | 33395  | GTTTGATTCTCGTTCCTATTTGTTTGGGGTGCCTAAGAGTAGAGTTCC TGGGTCTAACGG  | 33454  |
| Sbjct | 181036 | GTTTGATTCTCGTTCCTATTTCTTTGGGGTGCCTAAGAGTAGAGTTCC TGGGTCCAACAG  | 180977 |
| Query | 33455  | GAGTTCTACATTTAACCTTCTGAGCCACTGCAGACTGTTTCTCACAGTGGCTGCAACTTT   | 33514  |
| Sbjct | 180976 | GGGTTCATATTTAACCTTCTGAGCCACTGCAGACTGTTTTCACAGTGGCTGCAACTTT     | 180917 |
| Query | 33515  | ATCCATTTCTACCATCAATGTATCAGGGTTACAATTTCTTTACATCCTTGTTACACTTA    | 33574  |
| Sbjct | 180916 | ATCCATTTCTACCATCAATGTATCAGGGTTACAATTTCTTTACGTCCTTCTTCACACTTA   | 180857 |
| Query | 33575  | TTTTCC TTTAAATCATCCTAGTAGGGTGATATTGGTGTCTGCTTGTGTTTTCATTTGCA   | 33634  |
| Sbjct | 180856 | TTTTCC TTTAAATCATCCTAGTAGGGTGATATTGGTGGCTGCTTGTGTTATTATTGCA    | 180797 |
| Query | 33635  | TTTCCCTAATGACTAATGATCCTGAGCAGCTTTTCCTGTGCTACTATCTGTGGCTATATC   | 33694  |
| Sbjct | 180796 | TTTCCCTAATGACTAATGATCCTGAGCAGCTTTTCCTGTGCTACTATCTGTGGCTATATC   | 180737 |
| Query | 33695  | TTCTTTTAGGGAAATATATGTTGAAGTC ttttggccatttttaagagttgtctgattttt  | 33754  |
| Sbjct | 180736 | TTCTTTTAGGGAAATATATGTTGAAGTC TTTTGCCATTTTTAAAGAGTTGCTCGATTTT   | 180677 |
| Query | 33755  | at tttagtttagttgttgtttagatttttgAATATATCTTAAATATATTTAAAAATATATT | 33814  |
| Sbjct | 180676 | ATTTAGTTTAGTTGGTGTCTGTAGATTTT TGAATATATCTTAAATATATTTTAAA-ATATT | 180618 |
| Query | 33815  | CTAAATTTTAGTCTCTTTACAAGATAAATGATTGCAAAATATT TCCCCCTTTGTGTAGAAC | 33874  |
| Sbjct | 180617 | CTAAATTTTAGTCTCTTTACAAGATAAATGATTGCAAAATATT TCCCCCTTTGTGTAGAAC | 180558 |
| Query | 33875  | TTTAGATTTCACAAACTTCATTAATTTGTAGAAATCCTCAGCAGTTGACCCCAAACAGAT   | 33934  |
| Sbjct | 180557 | TTTAGATTTCACAAACTTCATTAATTTGTATGAAATCCTCAGCAGTTGACCCCAAACAGAT  | 180498 |
| Query | 33935  | AAGACTGAAGCAGTATCTTAGGAATAGTTGAAAGTATGATCACCACAAACATAAGCGTA    | 33994  |
| Sbjct | 180497 | AAGACTGAAGCAGTATTTTAGGAATAGTTGAAAGTATGATCACCACAAACATAAGCCTA    | 180438 |
| Query | 33995  | ATCAAACTCCTGCAAGCTACATGTAAGGCACAATGACAAATAAGGCAGCAAAGGGCCATCT  | 34054  |
| Sbjct | 180437 | ATCAAACTCCTGCAAGCTACATGTAAGGCACAATAACAAATAAGGCAGCAAAGGGCCATCT  | 180378 |
| Query | 34055  | GGTGATTAGTTTACCACACTTGTTGCAACTGTTTGTGCTGCAGAATTAAAACATACCAGC   | 34114  |
| Sbjct | 180377 | GGTGATTAGTTTACCACACTTGTTGCAACTGTTTGCCTGCAGAGTTAAAACATACCAGC    | 180318 |
| Query | 34115  | ATTCAACCCATGTCTCCTCTCTTGAAGTAAACTGTGCTATGTTGGCTGGCCTGAACAAGC   | 34174  |
| Sbjct | 180317 | ATTCAACCCATGTCTCCTCTCTTGAAGTAAACTGTAGTATGTTGGCTGGCCTGAACAAGC   | 180258 |
| Query | 34175  | GTAGATATTTCTCCATCCTCAATTAATATGCATGCATGACAAAGAAAGGAGGCCGGGATG   | 34234  |
| Sbjct | 180257 | GTAGGTATTCTCCATCCTCAATTAATATGCATGCATGACAAAGAAAGGAGGCCTGGATG    | 180198 |
| Query | 34235  | AAAAAATATTGTGTGATTAAATAATTATGCTTTAATTAATTTTAAAGGATATAATTTCAGT  | 34294  |
| Sbjct | 180197 | AAAAAATATTGTGTGATTAAATAATTATGCTTTAATTAATTTTAAAGGATATAATTTCAGT  | 180138 |
| Query | 34295  | ACTTCTAATTCTCCCATCAGCAGTTATAACAAAGGATTAGTGAATAAATACCATAGACTG   | 34354  |
| Sbjct | 180137 | ACTTCTAATTCTCCCATCAGCAGTTATAACAAAGGATTAGTGAATAAATACCATAGACTG   | 180078 |
| Query | 34355  | TTTTGCCTAGAAATGAATCCAATCTGTCTATTAACTTTGCTTTTATTCAAGTGCAAAAT    | 34414  |
| Sbjct | 180077 | TTTTGCCTAGAAATCGAATCCAATCTGTCTATTAACTTTGCTTTTATTCAAGTGCAAAAT   | 180018 |
| Query | 34415  | GCTAAAAACATAATAACTACAGTGACAGCCACTGTGGATCCTCAGAGGCAAAATTAGTC    | 34474  |
| Sbjct | 180017 | GCTAAAAACATAATAACTGCAGTGACAGCCACTGTGGATCCTCAGAGGTAAAGTAGTC     | 179958 |
| Query | 34475  | TTGGGACATAAACTCCTGCAAGCTAATATTGTTTTTACAGGGTTTAGAAAACCATTTAGCT  | 34534  |
| Sbjct | 179957 | TTGCGACATAAACTCCTGCAAGCTAATATTGTTTTTACAGGGTTTAGAAAACCATTTAGCT  | 179898 |
| Query | 34535  | GGGTTTCAAACCTCACAGTGTGAGCAGTGGGACTCTCATCAAAC TATAGCATGTGCTTCA  | 34594  |
| Sbjct | 179897 | GGGTTTCAAACCTCACAGTGTGAGCAGTGGGACTCTCATCAAAC TATAGCATGTGCTTCA  | 179838 |
| Query | 34595  | GTACCATTGTGTAGACTGACTCATTCCCATTGCCCTTAAGTTGCCATCAGCAAAATGCCAGG | 34654  |
| Sbjct | 179837 | GTACCATTGTGTAGACTGACTCATTCCCATTTTCTTAAGTTGCCATCAGCAAAATGCCAGG  | 179778 |
| Query | 34655  | GACTCTATTTCTTGCTCCTTAGCTCCTCGTTCTTGCTTGTCTTTCACAGGGAAGATTT     | 34714  |
| Sbjct | 179777 | GACTCTATTTCTTGCTCCTTAGCTCCTCGTTCTTGCTTGTCTTTCACAGGGAAGATTT     | 179718 |
| Query | 34715  | TCTAGCAGGAGCTCAAGCTGTGCTTTTAAATGAAACACATCCACACACTGTCTGTTGT     | 34774  |
| Sbjct | 179717 | TCTAGCAGGAGCTCAAACGTGCTTTTAAATGAAACACATCCACACACTGTCTGTTGT      | 179658 |
| Query | 34775  | CCACATTAAGCAGAGCTCCCTGAATAACTCATGAACAAAAGCATCTATGACTAACTGTTG   | 34834  |
| Sbjct | 179657 | CCACATTAAGCAGAGCTCCCTGAATAACTCATGAACAAAAGCATCTATGACTAACTGTTG   | 179598 |
| Query | 34835  | CTGTGTGTCTCCTCTAGCCTCTGAGGAGTCTCTAGTTTACAAGGACAGAGGAGATGGAGAG  | 34894  |
| Sbjct | 179597 | CTCTGTGTCTCCTCTAGCCTCTGAGGAGTCTCTAGTTTACAAGGACAGAGGAGATGGAGAG  | 179538 |
| Query | 34895  | AGGCCAGTCAACGTGAGGGTAAGGTTGCCTTGCTTTCTCTGAAATAGAAATGTTCTTTTC   | 34954  |
| Sbjct | 179537 | AGGCCAGTCAACGCGAGGGTAAGGTTGCCTTGCTTTCTCTGAAATAGAAATGTTCTTTTC   | 179478 |
| Query | 34955  | TTGGTGTCTTTCTTTTTCAACTGACTTTACATGTGAAAAAATGACAATGTCCATGACAGG   | 35014  |
| Sbjct | 179477 | TTGGTGTCTTTCTTTTTCAACTGACTTTACATGTGAAAAAATGACAATGTCCATGACAGG   | 179418 |
| Query | 35015  | TATTA AATGCAGTTTCTGAGGGGGAGGAAGAAGTGACTCTTAGCAACTGATATGTAATC   | 35074  |
| Sbjct | 179417 | TATTA AATGCAGTTTCTGAGGGGGAGGAAGAAGTGACTCTTAGCAACTGATATGTAATC   | 179358 |
| Query | 35075  | CAAAATGGCATTTAGCTATGACGGCTTCAGGTTGTAGACTGTATCCTTGGGATCCTTGTC   | 35134  |
| Sbjct | 179357 | CAAAATGGCATTTAGCTATGACGGCTTCAGGTTGTAGACTGTATCCTTGGGGTCCTTGTC   | 179298 |
| Query | 35135  | CTTGGAAGCAATGTCTTCTCCTTGGATT CAGTATTTTGCACTTGCCAACTACGTGGACC   | 35194  |
| Sbjct | 179297 | CTTGGAAGCAATGTCTTCTCCTTGGATT CAGTATTTTGCACTTGCCAACTACGTGGACC   | 179238 |
| Query | 35195  | TGAGAGATACACCATCCAGAAGCTGATGTCTTTTCCAGTGTGTATCCTACCCTTGTCTTG   | 35254  |
| Sbjct | 179237 | TGAGAGATACGCCATCCAGAAGCTGATGTCTTTTCCAGTGTGTATCCTACCCTTGTTTGT   | 179178 |
| Query | 35255  | GAGGCCTTGAAGTTGACTACACTTTCTGATCAAGTTTTCAGTATTCATTGAGAGAAACAG   | 35314  |
| Sbjct | 179177 | GAGGCCTTGAAGTTGACTACACTTTCTGATCAAGTTTTC AATATTCATTGAGAGAAACAG  | 179118 |
| Query | 35315  | AGCCTTGTGCAAACAATCCACAACATGACATACCCCTCAAAAAGTTTGTGTTCTGTATTG   | 35374  |
| Sbjct | 179117 | AGCCTTGTGCAAACAATCCACAACATGACATACCCCTCAAAAAGCTTTGTGTTCTGTATTG  | 179058 |
| Query | 35375  | CAGGTGGTGCAGGTGGGCCCTCTGAGGCGTGAATCTAGTAAGTATTCTGGAATCACTTGC   | 35434  |
| Sbjct | 179057 | CAGGTGGTGCAGGTGGGCCCTCTGAGGCGTGAATCTAGTAAGTATTCTGGAATCACTTGC   | 178998 |
| Query | 35435  | CAAGAAAACAATCTGGATGCCAAGAAAGGTGTGGCATCCTTGCTGGTTTCAATGTGAAG    | 35494  |
| Sbjct | 178997 | CAAGAAAACAATCTGGATGCCAAGAAAGGTGTGGCATCCTTGCTGGTTTCAATGTGAAG    | 178938 |
| Query | 35495  | AGCCACCCGTATCCTGGGATTGTGATAGGAATAAGTATAGGGGAAGTG tttttttAAAAAC | 35554  |
| Sbjct | 178937 | AGCCTCCCTGATCCTGGGATTGTGATAGGAATAAGTATAGGGGAAGTG TTTTAAAAAC    | 178878 |
| Query | 35555  | CTGAATTCCCCAGGGAAAAAATTATGGCCAAATTTTGAGGAAGCAGCTGTGCTCCCTTTTG  | 35614  |
| Sbjct | 178877 | CTGAATTCCCCAGGGAAAAATTATGGCCAAATTTTGAGGAAGCAGCTGTGCTCCCTTTTG   | 178818 |

|       |        |                                                                                                               |        |
|-------|--------|---------------------------------------------------------------------------------------------------------------|--------|
| Query | 35615  | GGTGGTGTCTGAGTTGGGTGCTTGAGGATTGGTGGTGTCTTGTTTGAGGCTGCATCgtgtg                                                 | 35674  |
| Sbjct | 178817 | GGTGGTGCCGAGTTGGGTGCTTGAGGATTGGTGGTGTCTTGTGTGAGGCTGCATCGTGTG                                                  | 178758 |
| Query | 35675  | gtgtgaatgtgtgtgttttctgtacaggtgaggctgtgtgtTTTCTCAGGAGAGATTTCCC                                                 | 35734  |
| Sbjct | 178757 | GTGTGAATGTGTGTGTTTCTGTACAGGTGAGGCTGTGTGTTTCTCAGGAGAGATTTCCC                                                   | 178698 |
| Query | 35735  | ACTTATACAACCCAATCACCAGTGTCCACTTCTAACAATAAAATCCACCCCGCTCTACT                                                   | 35794  |
| Sbjct | 178697 | ACTTATACAACCCAATCACCAGTGTCCACTTCTAACAATAAAATCCACCCCACTCTACT                                                   | 178638 |
| Query | 35795  | CTCTCTGTACAGTGACTCCCTCTACCCTCACCAGAGCCATCCCCGGGTCTGCCTTATTATC                                                 | 35854  |
| Sbjct | 178637 | GTCTCTGTACAGTGACTCCCTCCACCCTCACCAGAGCCATCCCCAGGTCTGCCTTATTATC                                                 | 178578 |
| Query | 35855  | CCGACTACTCAGGTGGGAGAACCTGAAGGGCCAAGGGAGTGGCCCCAGTCCTGAGTTCCT                                                  | 35914  |
| Sbjct | 178577 | CCCAGTGTCTCAGGTGGGAGAACCTGAAGGGCCAAGGGAGTGGCCCCAGTCCCGACTTCCT                                                 | 178518 |
| Query | 35915  | GAATGAAAAAGTGAAAACACGAACCCAGGAGTGTGGGCCAGTGCTGACACTGACATGCAC                                                  | 35974  |
| Sbjct | 178517 | GAATGAAAAAGTGAAAACACGAACCCAGGAGTGTGGGCCAGTGCTGACGCTGACATGCAC                                                  | 178458 |
| Query | 35975  | TTAGTCATGGAGTGTTCACCACCACACAGGGAGTTCAGCATTCATCTATAAGCCCTAAAG                                                  | 36034  |
| Sbjct | 178457 | TTAGTCATGGGGTGTTCACCACCACACAGGGAGTCCAGCATTCATGTATAAGCCCTAAAG                                                  | 178398 |
| Query | 36035  | CACCGAGCCCAAAAGGCCCCAGACACTGCCCATCATCATAAAGTGGCCTCTGTGGTCACA                                                  | 36094  |
| Sbjct | 178397 | CACCGAGCCCAAAAGGCCCCAGACACTGCCCATCATCATAAAGTGGCCTCCGTGGTCACA                                                  | 178338 |
| Query | 36095  | CAACCCAGGGCAGTTATAGGCTCATCTCCCCACGGACAGGCATAGTCATCAGTGTGTCAA                                                  | 36154  |
| Sbjct | 178337 | CAACCCAGGGCAGTTATAGGCTCATCTCCCCACGGACCGGCATAGTCATCAGTGTGTCAA                                                  | 178278 |
| Query | 36155  | AAGCACAAAGATCCCCAGGTGTTTGTGCTCAGCTCACAGATC----tttttttttAACTT                                                  | 36210  |
| Sbjct | 178277 | AAGCACAAAGATCCCCAGGTGTTTGGCTCAGCTCACAGATCCCCCTTTTTTTTTAACTT                                                   | 178218 |
| Query | 36211  | TTAAGTTTCAGGGGTACATGTGCAGGATGTGCAGGTTTGCTACATATAGAAATGTGTGTCA                                                 | 36270  |
| Sbjct | 178217 | TTAAGTTTCAGGGGTACATGTGCAGGATGTGCAGGTTTGCTACATATATGAATGTGTGTTA                                                 | 178158 |
| Query | 36271  | TGAGAGTTTGTGTGTACAGATTATTGCATCACCCATACATTGAGCCTAAATATCAGCTATTT                                                | 36330  |
| Sbjct | 178157 | TGAGAGTTTGTGTGTACAGATTATTGCATCACCCATATATTGAGGCTAATATCAGTTATTT                                                 | 178098 |
| Query | 36331  | TTCCTGATCCCTCCCCCTCCCTCCCACCTCCCACCTCC---AGTGGGCCCCACGCTCACAA                                                 | 36387  |
| Sbjct | 178097 | TTCCTGATCCACCCCTCCCTCCCACCTCCCACCTCCTCCAGTAGGCCCCACGCTCACAA                                                   | 178038 |
| Query | 36388  | ATTCTAAGAGGAGTGGGGGACCACAAATGCCAGTGTGGCCCACTTCAGTTGTGAAGTTAA                                                  | 36447  |
| Sbjct | 178037 | ATTCTAAGAGGAGTGGGGGACCACAAAGGCCAGTGTGGCCCACTTCAGTTGTGAAGTTAA                                                  | 177978 |
| Query | 36448  | TTTGCTCAGCAGCTGGCCAAAGCCTGTAAGGATGGGTGATGTATTTTAGTAGATTTAGTA                                                  | 36507  |
| Sbjct | 177977 | TCTGCTCAGCAACTGGCCAAAGTCTATAAGGATGGGTGATGTATTTTAGTAGATTTAGTA                                                  | 177918 |
| Query | 36508  | ATACTATCTTCCCAAGCCCTAAAATGCTCAAAACCTGCCAGCCAAAAATGGTGAGGAGGG                                                  | 36567  |
| Sbjct | 177917 | ATACTATCTTCCCAAGCCCTAAAATGCTCAAAATCCTGCCAGCCAAAAATGGTGAGGAGGG                                                 | 177858 |
| Query | 36568  | ACAGATAGGAACTCTGTGTGGCACTTGGTTATTAGCCTGGCTTCCATCCCTTAGTGGCAA                                                  | 36627  |
| Sbjct | 177857 | ACAGATAGGAACTCTGTGTGGCACTTGGTTATTAGCCTGGCTTCCATCCCTTAGTGGCAA                                                  | 177798 |
| Query | 36628  | CTCTCTTGTATATGTGGGTTAAAGACCCTCAGCCTCAAGCCAAGCCTCCTCCATGAGGAG                                                  | 36687  |
| Sbjct | 177797 | CTCTCTTGTATATGTGGGTTAAAGACCCTCAGCCTCAAGCCAAGCCTCCTCCATGAGGAG                                                  | 177738 |
| Query | 36688  | CCATCTCACTATTGACTGGCTAGTGCCGGGTATGGCCACCAGCCCACTGAAACAAAATG                                                   | 36747  |
| Sbjct | 177737 | CCATCTCACATTGACTGGCTAGTGCCGGGTATGGCCACCAGCCCACTGAAACAAAATG                                                    | 177678 |
| Query | 36748  | TTGCTTTAAAAACAAGTGTAATCTCATACA---ACAGGCAAAATGCAGAAGCAATGTGGT                                                  | 36803  |
| Sbjct | 177677 | TTGCTTTAAAAACAAGTGTAATCTCATACATACAACAGGCAAAATGCAGAAGCAGTGTGGT                                                 | 177618 |
| Query | 36804  | CTCGCAAGTTGTAAAGAGGACAGTCGCAATTTTGCTGGACTTCAACCTGGGTAGAAGACA                                                  | 36863  |
| Sbjct | 177617 | CTCGCAAGTTGTAAAGAGGACAGTCGCAATTTTGCTGGACTTCAACCTGGGTAGAAGACA                                                  | 177558 |
| Query | 36864  | TGAGGGAACCTCTGCTACTGAATCACGGCAGAGTTCAAGGCCACTTGTAGACTATTTTCATG                                                | 36923  |
| Sbjct | 177557 | TGAGGGAACCTCTGCTACTGAATCACGGCAGAGTTCAAGGCCACTTGTCAGACTATTTTCATG                                               | 177498 |
| Query | 36924  | TTACAGAAGGTAGCCTTTAGTACTAAGCAAAGGCCTCGGTTTCTCATTTCTTTCCTGTT                                                   | 36983  |
| Sbjct | 177497 | TTACAGAAGGTGGCCTTTAGTACTAAGCAAAGGCCTCTGTTTCTCATTTCTTTCCTGTT                                                   | 177438 |
| Query | 36984  | CATCTTCTTGGTCATCCTTCTTCCGCAAGGGAAACGAGCCCAAGCAAAAGGCAGTTTCAA                                                  | 37043  |
| Sbjct | 177437 | CATCTTCTTGGTCATCCTTCTTCCGCAAGGGAAACGAGCCCAAGCAAAAGGCAGTTTCAA                                                  | 177378 |
| Query | 37044  | TATTAATTTGACCGAGGTTTTTGTGCAGTTTATTATCATCCAGGTAATCAGGTGCAACCCA                                                 | 37103  |
| Sbjct | 177377 | TATTAATTTGACCGAGGTTTTTGTGCAGTTTATTATCATCCAGGTAATCAGGTGCAACTCG                                                 | 177318 |
| Query | 37104  | GTCTGCCTAGCAGCCCCCTCTCTCTGCTCTGTGTTTTCATTTAATAAACATTTTGGTCT                                                   | 37163  |
| Sbjct | 177317 | GTCTGCCTAGCAGCCCCCTATCTCTGCTCTGTGTTTTCATTTAATAAACATTTTGGTCT                                                   | 177258 |
| Query | 37164  | ACTTACTATGTGCTAGATTTTCTCGAGACCAAGTAAATGAGATAGAATCTTTATGTTGGC                                                  | 37223  |
| Sbjct | 177257 | ACTTACTATGTGCTAGATTTTCTCGAGACCAAGTAAATGAGATAGAATCTTTATGTTGGC                                                  | 177198 |
| Query | 37224  | AGCTAAGTTAGATTTAACATAACTGACAAAAATTAAAAATTCTGATTTCTTGTA AAAAT-                                                 | 37282  |
| Sbjct | 177197 | AGCTAAGTTAGATTTAACATAACTGACAAAAATTAAAAATTCTGATTTCTTGTA AAAATA                                                 | 177138 |
| Query | 37283  | ---TGTATGTGTGAATGCATACTGAAAGTAAAGTGGTTAACa a a a a a a TCACACTTGCA                                            | 37339  |
| Sbjct | 177137 | TTTTGTATGTGTGAATGCATACTGAATGTAAAGTGGATAA-AAAAC---TCACACTTGCA                                                  | 177082 |
| Query | 37340  | CTCATGGAAGGCTTTTCATGAATTTGTCAATTTCTA t t t t t t t ATATTTCCCCACTTCAC                                          | 37399  |
| Sbjct | 177081 | CTCATGGAAGGCTTTTCATGAATTTGTCAATTTTATTTT T -ATATTTCCCCACTTCAC                                                  | 177023 |
| Query | 37400  | TGGATAATGCATATCTGAACCTGGAACTGATTC C C C A C T G T A G A A A G T T C T G A G C C A C                           | 37459  |
| Sbjct | 177022 | CGGATAATGCATACCTGAACCTGGAACTGATTC C C C A C T G C A G A A A G T T C T G A G C C A C                           | 176963 |
| Query | 37460  | ATCCCTTAGCTTCACTAGTGCAGGTCCACCTGGGAGTATGTCC C A G C A T C A G C T T G G C C C                                 | 37519  |
| Sbjct | 176962 | ATCCCTTAGCTTCACTAGTGCAGGTCCACCTGGGAGGATGTCC C A G C A T C A G C T T G G C C C                                 | 176903 |
| Query | 37520  | ATGCTGTGATAAGCCACCTCCATGCACCACACCAAGCAAGCCCTGGGTGATTCACAGTC                                                   | 37579  |
| Sbjct | 176902 | ATGCTGTGATCAGCCACCTCCATGCACCACACCAAGCAAGCCCTGGGTGATTCACAGTC                                                   | 176843 |
| Query | 37580  | TCCACCACCAAGGGCACTGACCTTTATTCTGTGTTCTTCAAGCTCC C C C A T G G G G A C A C C A T                                | 37639  |
| Sbjct | 176842 | TCCACTACCAGGGCACTGACCTTAACTCTGTGTTCTTCTAGCTCC C C C A T G A G G A C A C C G T                                 | 176783 |
| Query | 37640  | CCACGACATCACGAACGAGGACGCCGTC-CACGACACCACCGACGAGGACGCCGTC C C A T G                                            | 37698  |
| Sbjct | 176782 | ACACAACATCACTAACGAGGACGCC-TCACACGATATCACTAACGAGGACGCCATACACG                                                  | 176724 |
| Query | 37699  | GCACCGCCGACGAGGACGCCGTC C A G G G C A T C G C C G A C G A G G A C G C C G T C C A C G G C A T C G             | 37758  |
| Sbjct | 176723 | ACGTCGCTAACGAGGACGCTGTCCACGGCATCGCTAATGAGGCCACCGACAAGGGCATCG                                                  | 176664 |
| Query | 37759  | CTGACTGGGACGCCATCCAGGGCCTCGCTGACAGGGACGCCGTC C A C G G C T T C G C T G A T G                                  | 37818  |
| Sbjct | 176663 | CCAACGAGGACACCGCC C A G G G C A T C G C C A A C G T G G T C G C C G T C C A C G G C A T C G C C A A C G       | 176604 |
| Query | 37819  | GGGACGCCGTC A A G G G C A T C G C T G A C G G G A C G C C A C C C A G G G C A T C G C T G A A G G G G A C G   | 37878  |
| Sbjct | 176603 | AGGATGCCGCC C A G G G C A T C G C C A A C G A G G A T G C C G T C C A C G G C A T T G C T A A C G A G G A T G | 176544 |
| Query | 37879  | ACGTCCATGGCATCGCTGATG 37899                                                                                   |        |
| Sbjct | 176543 | CCGTGCACGGCATCACTAATG 176523                                                                                  |        |

**Figure S3.** Nucleotide sequence alignment of RNA gene FAM230C with a segment of ch22 from the chimpanzee genome. The alignment begins at FAM230C, position 20796, which represents the 3rd TBTA repeat of FAM230C (as shown by RepeatMasker analysis, Table 3 ref. 12), and ends 29 nt from the 3'end of FAM230C, 37928 nt. Alignment by NCBI Blast Basic Local Alignment Search Tool ([https://blast.ncbi.nlm.nih.gov/Blast.cgi?CMD=Web&PAGE\\_TYPE=BlastHome](https://blast.ncbi.nlm.nih.gov/Blast.cgi?CMD=Web&PAGE_TYPE=BlastHome)).
